# Supplementary material
Source: PubMed Central journal article supplement (PMC6722012)

## **Supplemental -Table of Content**

### A- Methods

DNA extraction and 16S sequencing;  
Estimation of alpha and beta diversity;  
Pathway analyses;  
Network analyses;  
Assays of circulating biomarkers.  
References

### B- Tables

Table 1: Comparison of the NYC and BCN cohorts at pre-surgery.  
Table 2: Comparison of the effect of surgery at 1 year in the NYC and BCN cohorts.  
Table 3: Comparison of the two surgery groups (SG n=7 and RYGB n=5) in the BCN cohort.  
Table 4: Spearman correlations between individual circulating bile acids and stool bacteria.  
Table 5: Bile acids definitions

### C- Figures

Figure 1: Magnitude of change (express as % increase or decrease) of clinical characteristics, circulating biomarkers of metabolism, of inflammation and of microbial metabolism.  
Figure 2: Pathway Analysis  
Figure 3: Correlations Analyses  
Figure 4: Network Analyses

## **Methods**

### **Microbiome analyses**

#### *DNA extraction and 16S sequencing*

DNA was extracted from fecal samples using the PowerLyzer PowerSoil DNA isolation kit (MoBio, Carlsbad CA). DNA quality and quantity were measured with the Nanodrop 1000 (Thermo Fisher Scientific, Wilmington DE). For each sample, the V4 region of bacterial 16S rRNA genes was amplified in triplicate reactions using the universal bacterial primer set 515F/806R, which amplifies bacterial and archaeal 16S rRNA genes<sup>(1)</sup>. PCR reactions contained 12  $\mu$ l molecular biology grade water (Corning Cellgro, Atlanta GA), 10  $\mu$ l 5 Prime Hot Master Mix (5 Primer, Inc., Gaithersburg MD), 1.0  $\mu$ l each of the forward and reverse primers (each at 5  $\mu$ M final concentration), and 1  $\mu$ l genomic DNA. Reactions were held at 94°C for 3 min to denature the DNA, run for 35 cycles of amplification at 94°C for 45s, 50°C for 60s, and then 72°C for 90s, and completed with a final extension step of 10 min at 72°C. Amplicons from each sample were quantified using the PicoGreen dsDNA Assay Kit (Life Technologies, Eugene OR). Equal amounts of DNA from each sample were pooled, followed by PCR purification (Qiagen, Hilden, Germany). DNA concentrations in these sub-pools were quantified with the Qubit high sensitivity dsDNA Assay (Life Technologies), and combined at equal concentrations.

DNA sequencing was performed using the NYULMC Genome Technology Center Illumina MiSeq platform. The sequencing reactions generated 151-base-pair forward and reverse reads and a 12-base-pair barcode read. 16S rRNA sequencing reads were demultiplexed and quality filtered using QIIME version 1.9.1 with default settings as described<sup>(2)</sup>. Filtered reads were clustered into operational taxonomic units (OTUs) using a closed-reference OTU picking algorithm<sup>(3)</sup> with 97% similarity threshold against the GreenGenes database V13.8<sup>(4)</sup>.

#### *Alpha and beta diversity*

Alpha diversity was estimated using rarefied OTU tables at 5,000 sequences per sample, using Faith's phylogenetic diversity metric<sup>(5)</sup>. Beta diversity was estimated using unweighted UniFrac<sup>(6)</sup> on the rarefied OTU tables, and principal coordinate analyses (PCoA) was performed using the resulting UniFrac distance matrices. Significance of alpha diversity differences over time was estimated using repeated measures ANOVA on the diversity values obtained at 5,000 sequences/sample. Differences were considered significant, when  $p < 0.05$ , unless otherwise indicated.

Random forests were constructed using OTUs in each sample as features of the model and as implemented in QIIME through the supervised\_learning.py command, with 500 trees and leave-one-out error estimation<sup>(7)</sup>. Accuracy of the classifier was estimated by dividing the observed error by the percentage of subjects in the majority class, with ratios below 2 indicating poor classification accuracy<sup>(7)</sup>. The relative importance of each OTU in the model (i.e. its predictive power) was assessed by estimating the expected mean

decrease in accuracy when the OTU is excluded from the model, with higher decreases in accuracy corresponding to larger predictive power.

Analysis of enrichment/depletion of specific bacterial taxa in subgroups of patients (e.g. pre- versus post-surgery) was performed using LEfSe<sup>(8)</sup>. Significant taxa with linear discriminant log-scores larger than 2.0 were reported. A random forest classifier was used to test differences between subjects from the NYC and the BCN cohorts based on their microbiome composition<sup>(7)</sup>.

### *Pathway Analyses*

Bacterial functions were inferred from the 16S rRNA data using PICRUST<sup>(9)</sup>. The OTU table was normalized by the 16S rRNA gene copy number of each OTU, and functions were predicted from the normalized table and expressed as counts of KEGG orthologs (KOs) for each sample, with each KO being annotated to a KEGG pathway. Differential analysis of pathways was performed using STAMP v2 with default parameters<sup>(10)</sup>, and significance of differences in pathway enrichment/depletion was estimated using ANOVA and the Tukey-Kramer post-hoc test.

### *Network Analyses*

Co-occurrence network analyses were performed by filtering out singletons (OTUs with a single count) and summarizing the remaining OTUs at the genus level. Co-occurrences between genera were then estimated using SparCC<sup>(11)</sup> with 20 iterations, 500 bootstrap replicates, and filtering non-significant correlations ( $p < 0.05$ , two-sided). The filtered correlations were then imported into Cytoscape v3.0.2<sup>(12)</sup> to visualize them as a co-occurrence network. The network layout was selected as edge-weighted Spring embedded metrics in Cytoscape. We then identified groups of highly connected bacteria within this network. This problem is equivalent to the problem of finding maximal cliques in a graph: a clique is defined as any subset of vertices (i.e. bacteria) such that they are all adjacent, and a maximal clique is a clique that cannot be further extended. Finding all maximal cliques in a graph can be efficiently performed using the Bron-Kerbosch algorithm<sup>(13)</sup>. Because bacteria within a maximal clique are, by definition, adjacent to each other, they must also be significantly correlated to each other and thus their correlation with biomarkers is of similar magnitude.

### Assays

Determinations of plasma concentrations of glucose by the glucose oxidase method (Analox Instruments, Lunenburg MA), insulin by radioimmunoassay (RIA) (Millipore, St. Charles MO, serum amyloid A (SAA) protein by Elisa (Frederick MD), high-sensitivity C-reactive protein (hs-CRP) by Roche Integra 400 plus (Roche, Indianapolis IN), bile acids by liquid chromatography-mass spectrometry, TMAO, betaine and choline by liquid chromatography/ mass spectrometry in both positive and negative mode, SCFA by electron ionization for gas chromatography-mass spectrometry without derivatization, lipid panel, liver function tests and white cell counts were done by the Columbia University Diabetes Research Center Translational Bioanalytical Core, the Columbia University Irving biomarker core, and the Michigan Metabolomic Core, all certified Core

Laboratories. The homeostatic model for assessment of insulin resistance (HOMA-IR) was calculated<sup>(14)</sup>.

## References

- [1] Caporaso JG, Lauber CL, Walters WA, et al. Ultra-high-throughput microbial community analysis on the Illumina HiSeq and MiSeq platforms. *The ISME Journal*. 2012;6:1621-4.
- [2] Clemente JC, Pehrsson EC, Blaser MJ, et al. The microbiome of uncontacted Amerindians. *Science Advances*. 2015;1:e1500183.
- [3] Edgar RC. Search and clustering orders of magnitude faster than BLAST. *Bioinformatics*. 2010;26:2460-1.
- [4] McDonald D, Price MN, Goodrich J, et al. An improved Greengenes taxonomy with explicit ranks for ecological and evolutionary analyses of bacteria and archaea. *The Isme Journal*. 2011;6:610-18.
- [5] Faith DP. Conservation evaluation and phylogenetic diversity. *Biological Conservation*. 1992;61:1-10.
- [6] Lozupone C, Knight R. UniFrac: a new phylogenetic method for comparing microbial communities. *Applied and environmental microbiology*. 2005;71:8228-35.
- [7] Knights D, Parfrey LW, Zaneveld J, Lozupone C, Knight R. Human-associated microbial signatures: examining their predictive value. *Cell host & microbe*. 2011;10:292-6.
- [8] Segata N, Izard J, Waldron L, et al. Metagenomic biomarker discovery and explanation. *Genome Biology*. 2011;12:R60.
- [9] Langille MGI, Zaneveld J, Caporaso JG, et al. Predictive functional profiling of microbial communities using 16S rRNA marker gene sequences. *Nature biotechnology*. 2013;31:814-21.
- [10] Parks DH, Tyson GW, Hugenholtz P, Beiko RG. STAMP: statistical analysis of taxonomic and functional profiles. *Bioinformatics*. 2014;30:3123-4.
- [11] Friedman J, Alm EJ. Inferring Correlation Networks from Genomic Survey Data. *PLoS Computational Biology*. 2012;8:e1002687.
- [12] Shannon P, Markiel A, Ozier O, et al. Cytoscape: A Software Environment for Integrated Models of Biomolecular Interaction Networks. *Genome Research*. 2003;13:2498-504.
- [13] Bron C, Kerbosch J. Finding All Cliques of an Undirected Graph. *Commun Acm*. 1973;16:575-7.
- [14] Matthews DR, Hosker JP, Rudenski AS, et al. Homeostasis model assessment: insulin resistance and beta-cell function from fasting plasma glucose and insulin concentrations in man. *Diabetologia*. 1985;28:412-9.

**Supplemental Table 1: Comparison of Barcelona (BCN) and the New York City (NYC) cohorts at pre-surgery**

|                                 | BCN           | NYC          | P     |
|---------------------------------|---------------|--------------|-------|
| <i>N</i>                        | 12            | 14           |       |
| Age (years)                     | 44.5 (12.2)   | 39.5 (11.2)  | 0.258 |
| Gender (% women)                | 83.3          | 85.7         |       |
| Weight (kg)                     | 118.0 (18.6)  | 127.4 (14.8) | 0.237 |
| BMI (kg/m <sup>2</sup> )        | 45.6 (8.5)    | 46.5 (3.9)   | 0.181 |
| Systolic Blood Pressure (mmHg)  | 128.6 (12.3)  | 122.4 (12.1) | 0.189 |
| Diastolic Blood Pressure (mmHg) | 71.4 (17.9)   | 72.1 (18.6)  | 0.553 |
| Fasting Glucose (mmol/L)        | 6.7 (3.6)     | 6.5 (1.8)    | 0.237 |
| Fasting Insulin (pmol/L)        | 190.3 (108.3) | 193.1 (76.4) | 0.877 |
| HOMA-IR                         | 8.0 (6.0)     | 8.1 (3.8)    | 0.328 |
| HbA1c (%)                       | 6.4 (1.2)     | 6.0 (0.6)    | 0.486 |
| T-CHOL (mmol/L)                 | 4.8 (1.1)     | 4.9 (1.1)    | 0.719 |
| HDL (mmol/L)                    | 1.2 (0.3)     | 1.3 (0.4)    | 0.341 |
| LDL (mmol/L)                    | 3.0 (1.0)     | 2.8 (0.8)    | 0.703 |
| Triglycerides (mmol/L)          | 1.7 (1.0)     | 1.6 (1.2)    | 0.554 |
| WBC (K/mcL)                     | 8.5 (2.5)     | 7.8 (2.1)    | 0.681 |
| SAA (ng/mL)                     | 67.7 (66.9)   | 50.8 (35.4)  | 0.797 |
| hs-CRP (mg/L)                   | 7.3 (4.6)     | 11.4 (9.0)   | 0.217 |

Data are presented as mean (SD). SAA: serum amyloid A; hsCRP: ultrasensitive C reactive protein. WBC: white cell count.

**Supplemental Table 2: Comparison of the effect of surgical weight loss between the NYC and BCN cohorts.**

|                                   | BCN          | NYC          | P     |
|-----------------------------------|--------------|--------------|-------|
| <i>N</i>                          | 12           | 14           |       |
| $\Delta$ Weight (kg)              | 41.7 (12.9)  | 41.4 (10.4)  | 0.944 |
| $\Delta$ Weight (%)               | 35.0 (7.5)   | 32.3 (6.0)   | 0.324 |
| $\Delta$ BMI (kg/m <sup>2</sup> ) | 16.0 (4.6)   | 15.3 (3.8)   | 0.627 |
| $\Delta$ SBP (mmHg)               | 1.9 (21.6)   | 5.3 (10.1)   | 0.615 |
| $\Delta$ DBP (mmHg)               | 4.3 (18.7)   | 4.3 (17.8)   | 0.252 |
| $\Delta$ Fasting Glucose (mmol/L) | 2.3 (3.7)    | 1.5 (1.9)    | 0.483 |
| $\Delta$ Fasting Insulin (pmol/L) | 101.4 (90.3) | 130.6 (66.7) | 0.356 |
| $\Delta$ HOMA-IR                  | 5.4 (5.2)    | 6.2 (3.2)    | 0.629 |
| $\Delta$ HbA1c (%)                | 1.1 (1.2)    | 0.6 (0.5)    | 0.272 |
| $\Delta$ T-CHOL (mmol/L)          | 0.1 (1.3)    | 0.6 (1.0)    | 0.362 |
| $\Delta$ HDL-C (mmol/L)           | 0.4 (0.3)    | 0.2 (0.4)    | 0.311 |
| $\Delta$ LDL-C (mmol/L)           | 0.2 (1.3)    | 0.4 (0.8)    | 0.668 |
| $\Delta$ Triglycerides (mmol/L)   | 0.8 (0.9)    | 0.3 (0.6)    | 0.186 |
| $\Delta$ WBC (K/mcL)              | 2.0 (1.1)    | 1.1 (2.2)    | 0.283 |
| $\Delta$ SAA (ng/mL)              | 48.0 (60.0)  | 34.0 (30.1)  | 0.463 |
| $\Delta$ hs-CRP (mg/L)            | 5.9 (3.7)    | 10.4 (8.9)   | 0.122 |

Delta ( $\Delta$ ) change of weight, systolic (SBP) and diastolic (DBP) blood pressure and circulating biomarkers of metabolism and inflammation. Data are presented as mean (SD). WBC: white blood count; SAA: serum amyloid A; hsCRP: ultrasensitive C reactive

**Supplemental Table 3: Comparison of the two surgery groups (SG n=7 and RYGB n=5) in the BCN cohort.**

|                          | SG           |                            | RYGB         |                           | P     |
|--------------------------|--------------|----------------------------|--------------|---------------------------|-------|
|                          | Pre-surgery  | 12 months                  | Pre-surgery  | 12 months                 |       |
| <i>N</i>                 | 7            | 7                          | 5            | 5                         |       |
| Age (years)              | 50.2 (9.4)   | N/A                        | 36.6 (11.9)  | N/A                       | 0.069 |
| Weight (kg)              | 113.7 (20.4) | 76.3 (16.4) <sup>***</sup> | 123.8 (15.8) | 76.3 (5.8) <sup>**</sup>  | 0.787 |
| Weight loss (kg)         | N/A          | 37.5 (10.4)                | N/A          | 47.6 (14.9)               | 0.234 |
| Weight loss (%)          | N/A          | 33.0 (6.9)                 | N/A          | 37.7 (8.1)                | 0.326 |
| Excess weight loss (%)   |              | 78.34 (22.88)              |              | 75.33 (15.91)             | 0.707 |
| BMI (kg/m <sup>2</sup> ) | 46.4 (10.3)  | 31.0 (7.4) <sup>***</sup>  | 44.4 (5.8)   | 27.6 (4.2) <sup>***</sup> | 0.538 |
| SBP (mmHg)               | 127.3 (14.5) | 131.0 (20.2)               | 130.4 (9.6)  | 120.6 (9.2)               | 0.575 |
| DBP (mmHg)               | 75.4 (13.9)  | 79.0 (9.1)                 | 65.8 (23.0)  | 71.0 (9.2)                | 0.442 |
| Fasting Glucose (mmol/L) | 7.0 (4.5)    | 4.3 (0.5) <sup>*</sup>     | 6.4 (2.2)    | 4.6 (0.3)                 | 0.406 |
| Fasting Insulin (μU/mL)  | 25.0 (15.5)  | 12.6 (7.2) <sup>*</sup>    | 30.6 (17.0)  | 12.9 (5.9) <sup>*</sup>   | 0.214 |
| HOMA-IR                  | 6.6 (4.7)    | 2.5 (1.7) <sup>*</sup>     | 9.9 (7.7)    | 2.7 (1.4)                 | 0.048 |
| HbA1c (%)                | 6.5 (1.4)    | 5.4 (0.3) <sup>*</sup>     | 6.3 (1.1)    | 5.3 (0.2)                 | 0.936 |
| T-CHOL (mmol/L)          | 5.1 (1.0)    | 5.6 (0.9)                  | 4.4 (1.3)    | 3.5 (1.1)                 | 0.379 |
| HDL-C (mmol/L)           | 1.1 (0.3)    | 1.6 (0.3) <sup>**</sup>    | 1.2 (0.2)    | 1.5 (0.3)                 | 0.242 |
| LDL-C (mmol/L)           | 3.3 (1.0)    | 3.5 (0.7)                  | 2.5 (1.0)    | 1.7 (0.9)                 | 0.610 |
| Triglycerides (mmol/L)   | 2.0 (1.1)    | 1.1 (0.6) <sup>*</sup>     | 1.4 (0.9)    | 0.65 (0.2)                | 0.808 |
| WBC (K/mcL)              | 9.2 (2.8)    | 6.3 (1.1) <sup>*</sup>     | 7.35 (1.5)   | 5.6 (1.3) <sup>**</sup>   | 0.262 |
| SAA (ng/mL)              | 83.8 (80.1)  | 19.6(13.2) <sup>*</sup>    | 45.1 (37.6)  | 19.9 (24.0)               | 0.338 |
| hs-CRP (mg/L)            | 9.1 (4.6)    | 1.9 (1.3) <sup>**</sup>    | 4.8 (3.7)    | 0.6 (0.6) <sup>*</sup>    | 0.812 |

Differences from pre- and post-surgery within in surgical group: \* P < 0.05, \*\* P < 0.01, \*\*\* P < 0.001. Data are presented as mean (SD). Analyses performed via Wilcoxon signed-rank test or paired t-test. SBP: systolic blood pressure; DBP: diastolic blood pressure; SAA: serum amyloid A; hsCRP: ultrasensitive C reactive protein; RYGB: Roux-en-Y gastric bypass; SG: sleeve gastrectomy. P values are for differences between surgical groups of delta change from pre-surgery to 12 months. Analyses performed via Wilcoxon rank-sum test or independent sample t-test.

## Supplemental Table 4: Spearman Correlations between individual circulating bile acids and stool bacteria

Months: month since surgery; Taxa: p=phylum, c=class, o=order, f=family, g=genus

| Bile acids    | Corr coef    | P value     | Taxa                                                                                                   | Fdr         | Bonferroni  | Months |
|---------------|--------------|-------------|--------------------------------------------------------------------------------------------------------|-------------|-------------|--------|
| Conj12AlphaOH | -1           | 0           | p__Proteobacteria;c__Gammaproteobacteria;o__Enterobacteriales;<br>f__Enterobacteriaceae                | 0           | 0           | 3      |
| Conj12AlphaOH | -1           | 0           | p__Proteobacteria;c__Gammaproteobacteria;o__Enterobacteriales                                          | 0           | 0           | 3      |
| CA            | 0.991071429  | 1.44E-05    | p__Proteobacteria;c__Gammaproteobacteria;o__Enterobacteriales;<br>f__Enterobacteriaceae;g__Pantoea     | 0.005773946 | 0.005773946 | 3      |
| Conj12AlphaOH | -0.964285714 | 0.000454149 | p__Proteobacteria                                                                                      | 0.045528454 | 0.182113817 | 3      |
| Conj12AlphaOH | -0.964285714 | 0.000454149 | p__Proteobacteria;c__Gammaproteobacteria                                                               | 0.045528454 | 0.182113817 | 3      |
| CA            | 0.964285714  | 0.000454149 | p__Proteobacteria;c__Gammaproteobacteria;o__Enterobacteriales;<br>f__Enterobacteriaceae;g__Klebsiella  | 0.045528454 | 0.182113817 | 3      |
| CA            | -0.964285714 | 0.000454149 | p__Firmicutes;c__Clostridia;o__Clostridiales;f__Lachnospiraceae;<br>g__[Ruminococcus]                  | 0.045528454 | 0.182113817 | 3      |
| CA            | 0.964285714  | 0.000454149 | p__Proteobacteria;c__Gammaproteobacteria;o__Enterobacteriales;<br>f__Enterobacteriaceae;g__Erwinia     | 0.045528454 | 0.182113817 | 3      |
| GCDCa         | 0.964285714  | 0.000454149 | p__Proteobacteria;c__Gammaproteobacteria;o__Pasteurellales                                             | 0.060704606 | 0.182113817 | 3      |
| GCDCa         | 0.964285714  | 0.000454149 | p__Proteobacteria;c__Gammaproteobacteria;o__Pasteurellales;<br>f__Pasteurellaceae                      | 0.060704606 | 0.182113817 | 3      |
| GCDCa         | 0.964285714  | 0.000454149 | p__Proteobacteria;c__Gammaproteobacteria;o__Pasteurellales;<br>f__Pasteurellaceae;g__Aggregatibacter   | 0.060704606 | 0.182113817 | 3      |
| CA            | 0.955357143  | 0.000789528 | p__Proteobacteria;c__Gammaproteobacteria;o__Enterobacteriales;<br>f__Enterobacteriaceae;g__Citrobacter | 0.063320125 | 0.316600624 | 3      |
| Secondary     | -0.964285714 | 0.000454149 | p__Proteobacteria                                                                                      | 0.091056908 | 0.182113817 | 3      |
| Secondary     | -0.964285714 | 0.000454149 | p__Proteobacteria;c__Gammaproteobacteria                                                               | 0.091056908 | 0.182113817 | 3      |
| Secondary UnC | -0.928571429 | 0.002519472 | p__Firmicutes;c__Clostridia;o__Clostridiales;f__Christensenellaceae                                    | 0.144329776 | 1           | 3      |
| Secondary UnC | -0.928571429 | 0.002519472 | p__Firmicutes;c__Clostridia;o__Clostridiales;f__Christensenellaceae;<br>g__                            | 0.144329776 | 1           | 3      |
| Secondary UnC | 0.964285714  | 0.000454149 | p__Firmicutes;c__Bacilli;o__Lactobacillales;f__Leuconostocaceae;<br>g__Weissella                       | 0.144329776 | 0.182113817 | 3      |
| Secondary UnC | 0.928571429  | 0.002519472 | p__Proteobacteria;c__Betaproteobacteria;o__Burkholderiales;<br>f__Alcaligenaceae;g__Sutterella         | 0.144329776 | 1           | 3      |
| Secondary UnC | 0.928571429  | 0.002519472 | p__Proteobacteria;c__Betaproteobacteria;o__Burkholderiales;<br>f__Alcaligenaceae                       | 0.144329776 | 1           | 3      |
| Secondary UnC | 0.928571429  | 0.002519472 | p__Bacteroidetes;c__Bacteroidia;o__Bacteroidales;f__Prevotellaceae;<br>g__Prevotella                   | 0.144329776 | 1           | 3      |
| Secondary UnC | 0.928571429  | 0.002519472 | p__Bacteroidetes;c__Bacteroidia;o__Bacteroidales;f__Prevotellaceae                                     | 0.144329776 | 1           | 3      |
| TDCA          | 0.964285714  | 0.000454149 | p__Bacteroidetes;c__Bacteroidia;o__Bacteroidales;f__Porphyromonadaceae                                 | 0.182113817 | 0.182113817 | 3      |
| Total UC      | 0.964285714  | 0.000454149 | p__Proteobacteria;c__Deltaproteobacteria;o__Desulfovibrionales;<br>f__Desulfovibrionaceae;g__Bilophila | 0.182113817 | 0.182113817 | 3      |
| Total C       | -0.964285714 | 0.000454149 | p__Firmicutes;c__Clostridia;o__Clostridiales;f__Lachnospiraceae;<br>g__Roseburia                       | 0.182113817 | 0.182113817 | 3      |
| TDCA          | -0.964285714 | 0.000454149 | p__Firmicutes;c__Clostridia;o__Clostridiales;f__Lachnospiraceae;<br>g__                                | 0.182113817 | 0.182113817 | 3      |
| CDCa          | 0.964285714  | 0.000454149 | p__Firmicutes;c__Clostridia;o__Clostridiales;f__Ruminococcaceae;<br>g__Faecalibacterium                | 0.091056908 | 0.182113817 | 6      |
| CDCa          | 0.964285714  | 0.000454149 | p__Actinobacteria                                                                                      | 0.091056908 | 0.182113817 | 6      |
| GCDCa         | 0.964285714  | 0.000454149 | p__Firmicutes;c__Clostridia;o__Clostridiales;f__Veillonellaceae;<br>g__Acidaminococcus                 | 0.182113817 | 0.182113817 | 6      |
| Secondary     | -0.964285714 | 0.000454149 | p__Firmicutes;c__Clostridia;o__Clostridiales;f__Ruminococcaceae;<br>g__Ruminococcus                    | 0.182113817 | 0.182113817 | 6      |
| Conjugated    | -1           | 0           | p__Firmicutes;c__Clostridia;o__Clostridiales;f__Clostridiaceae;<br>g__Clostridium                      | 0           | 0           | 12     |
| 12-Alpha-OH   | -1           | 0           | p__Firmicutes;c__Clostridia;o__Clostridiales;f__Clostridiaceae;<br>g__Clostridium                      | 0           | 0           | 12     |
| Primary UC    | 1            | 0           | p__Firmicutes;c__Clostridia;o__Clostridiales;f__Ruminococcaceae                                        | 0           | 0           | 12     |
| Non12AlphaOH  | -0.973214286 | 0.000222306 | p__Proteobacteria;c__Gammaproteobacteria;o__Aeromonadales;<br>f__Aeromonadaceae;g__                    | 0.044572372 | 0.089144743 | 12     |
| TCA           | -0.973214286 | 0.000222306 | p__Proteobacteria;c__Gammaproteobacteria;o__Aeromonadales;<br>f__Aeromonadaceae;g__                    | 0.044572372 | 0.089144743 | 12     |



| Bile acids   | Corr coef    | P value     | Taxa                                                                                                  | Fdr         | Bonferroni  | Months |
|--------------|--------------|-------------|-------------------------------------------------------------------------------------------------------|-------------|-------------|--------|
| Non12AlphaOH | -0.973214286 | 0.000222306 | p__Proteobacteria;c__Gammaproteobacteria;o__Aeromonadales;<br>f__Aeromonadaceae                       | 0.044572372 | 0.089144743 | 12     |
| TCA          | -0.973214286 | 0.000222306 | p__Proteobacteria;c__Gammaproteobacteria;o__Aeromonadales;<br>f__Aeromonadaceae                       | 0.044572372 | 0.089144743 | 12     |
| TCA          | -0.964285714 | 0.000454149 | p__Proteobacteria;c__Gammaproteobacteria;o__Enterobacteriales;<br>f__Enterobacteriaceae;g__Klebsiella | 0.045528454 | 0.182113817 | 12     |
| TCA          | -0.964285714 | 0.000454149 | p__Proteobacteria;c__Gammaproteobacteria;o__Enterobacteriales;<br>f__Enterobacteriaceae;g__Erwinia    | 0.045528454 | 0.182113817 | 12     |
| CA           | 0.964285714  | 0.000454149 | p__Firmicutes;c__Clostridia;o__Clostridiales;f__Ruminococcaceae                                       | 0.182113817 | 0.182113817 | 12     |
| Total UC     | 0.964285714  | 0.000454149 | p__Firmicutes;c__Clostridia;o__Clostridiales;f__Ruminococcaceae                                       | 0.182113817 | 0.182113817 | 12     |
| CDCA         | 0.964285714  | 0.000454149 | p__Firmicutes;c__Clostridia;o__Clostridiales;f__Ruminococcaceae                                       | 0.182113817 | 0.182113817 | 12     |
| SecondConj   | -0.964285714 | 0.000454149 | p__Firmicutes;c__Clostridia;o__Clostridiales;f__Clostridiaceae;<br>g__Clostridium                     | 0.182113817 | 0.182113817 | 12     |
| GDCA         | -0.964285714 | 0.000454149 | p__Firmicutes;c__Clostridia;o__Clostridiales;f__Veillonellaceae;<br>g__Dialister                      | 0.182113817 | 0.182113817 | 12     |
| GCDCA        | -0.964285714 | 0.000454149 | p__Actinobacteria;c__Actinobacteria;o__Actinomycetales                                                | 0.182113817 | 0.182113817 | 12     |
| All Conj     | -0.964285714 | 0.000454149 | p__Firmicutes;c__Clostridia;o__Clostridiales;f__Clostridiaceae;<br>g__Clostridium                     | 0.182113817 | 0.182113817 | 12     |
| All BA       | -0.964285714 | 0.000454149 | p__Firmicutes;c__Clostridia;o__Clostridiales;f__Clostridiaceae;<br>g__Clostridium                     | 0.182113817 | 0.182113817 | 12     |
| GDCA         | -0.964285714 | 0.000454149 | p__Firmicutes;c__Clostridia;o__Clostridiales;f__Clostridiaceae;<br>g__Clostridium                     | 0.182113817 | 0.182113817 | 12     |

**Supplemental Table 5: Bile acids definitions**

**Unconjugated Bile Acids (Primary is red, Secondary is Blue)**

|      |                  |                                                                 |
|------|------------------|-----------------------------------------------------------------|
| DCA  | deoxycholic      | Hydroxyl group removed from CA by gut bacteria then becomes DC  |
| CDCA | chenodeoxycholic |                                                                 |
| UDCA | ursodeoxycholic  | Epimer of CDC                                                   |
| CA   | cholic acid      |                                                                 |
| LCA  | lithocholic      | Hydroxyl group removed from CDC by gut bacteria then becomes LC |

**Glycine Conjugated Bile Acids (aka Bile Salts) (Primary is green, Secondary is violet)**

|       |                        |  |
|-------|------------------------|--|
| GDCA  | glyco-deoxycholic      |  |
| GCDCA | glyco-chenodeoxycholic |  |
| GUDCA | glyco-ursodeoxycholic  |  |
| GCA   | glyco-cholic acid      |  |
| GLCA  | glyco-lithocholic      |  |

**Taurine Conjugated Bile Acids (aka Bile Salts) (Primary is green, Secondary is violet)**

|       |                        |  |
|-------|------------------------|--|
| TDCA  | tauro-deoxycholic      |  |
| TCDCA | tauro-chenodeoxycholic |  |
| TUDCA | tauro-ursodeoxycholic  |  |
| TCA   | tauro-cholic acid      |  |
| TLCA  | tauro-lithocholic      |  |

**Key**

|  |                      |                                                       |
|--|----------------------|-------------------------------------------------------|
|  | Primary Bile Acids   | Primary bile acids (CDC and CA)                       |
|  | Primary Bile Salts   | Primary bile salts (GDC, TDC, GUDC, TUDC, GLC, TLC)   |
|  | Secondary Bile Acids | Secondary bile acids (DC, UDC, LC)                    |
|  | Secondary Bile Salts | Secondary bile salts (GDC, TDC, GUDC, TUDC, GLC, TLC) |

**Supplemental Figure 1:** Magnitude of change (express as percent increase and percent decrease) of clinical characteristics and metabolic biomarkers (A) and circulating biomarkers of inflammation and microbial metabolism (B), for the entire cohort (n=26), one year after surgery. \*p<0.05, \*\*p<0.01, \*\*\*p<0.001.

**A.**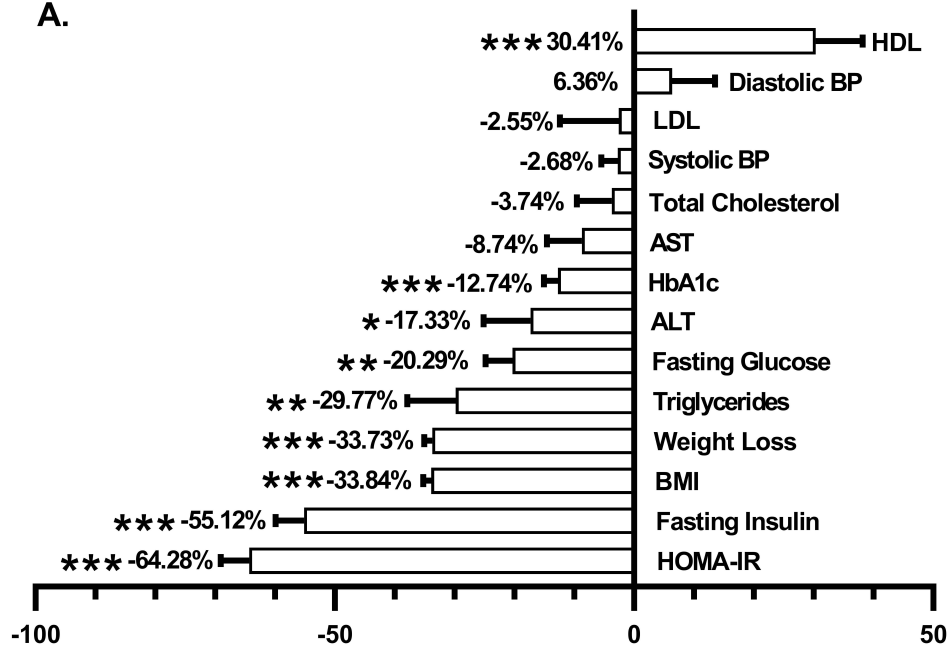**B.**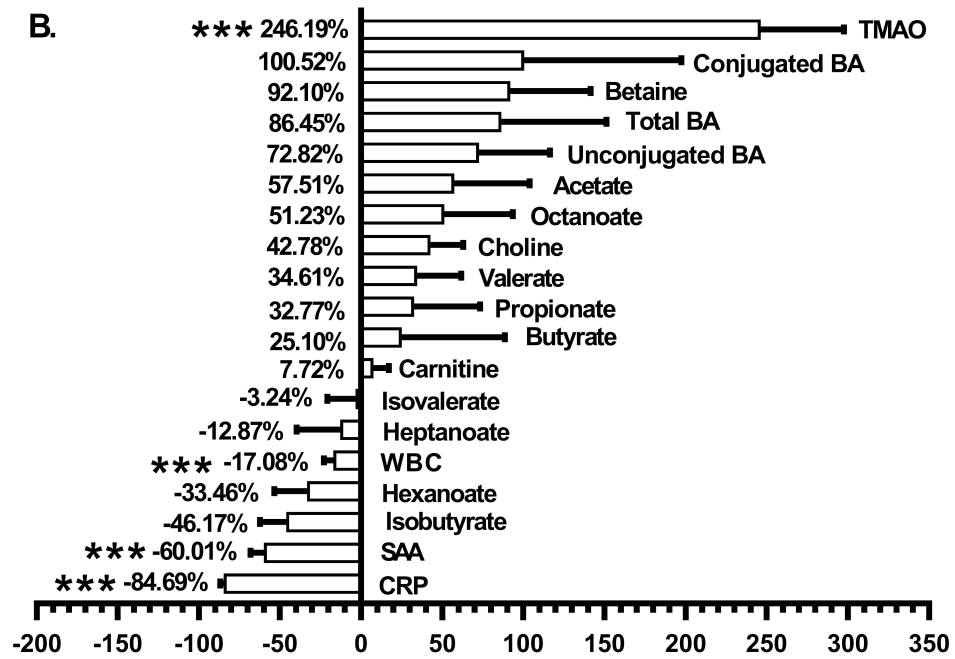

### Supplemental Figure 2: Pathway Analysis

Relative abundance of all microbial metabolism pathways significantly (false discovery rate (FDR)  $p < 0.05$ ) enriched between pre-surgery and 3m (A), pre-surgery and 6m (B), and pre-surgery and 12m (C). Effect size of differences between pre- and post-surgery, estimated as  $\eta^2$ . Change overtime of the relative abundance of pathways differentially enriched pre- and post-surgery (D).

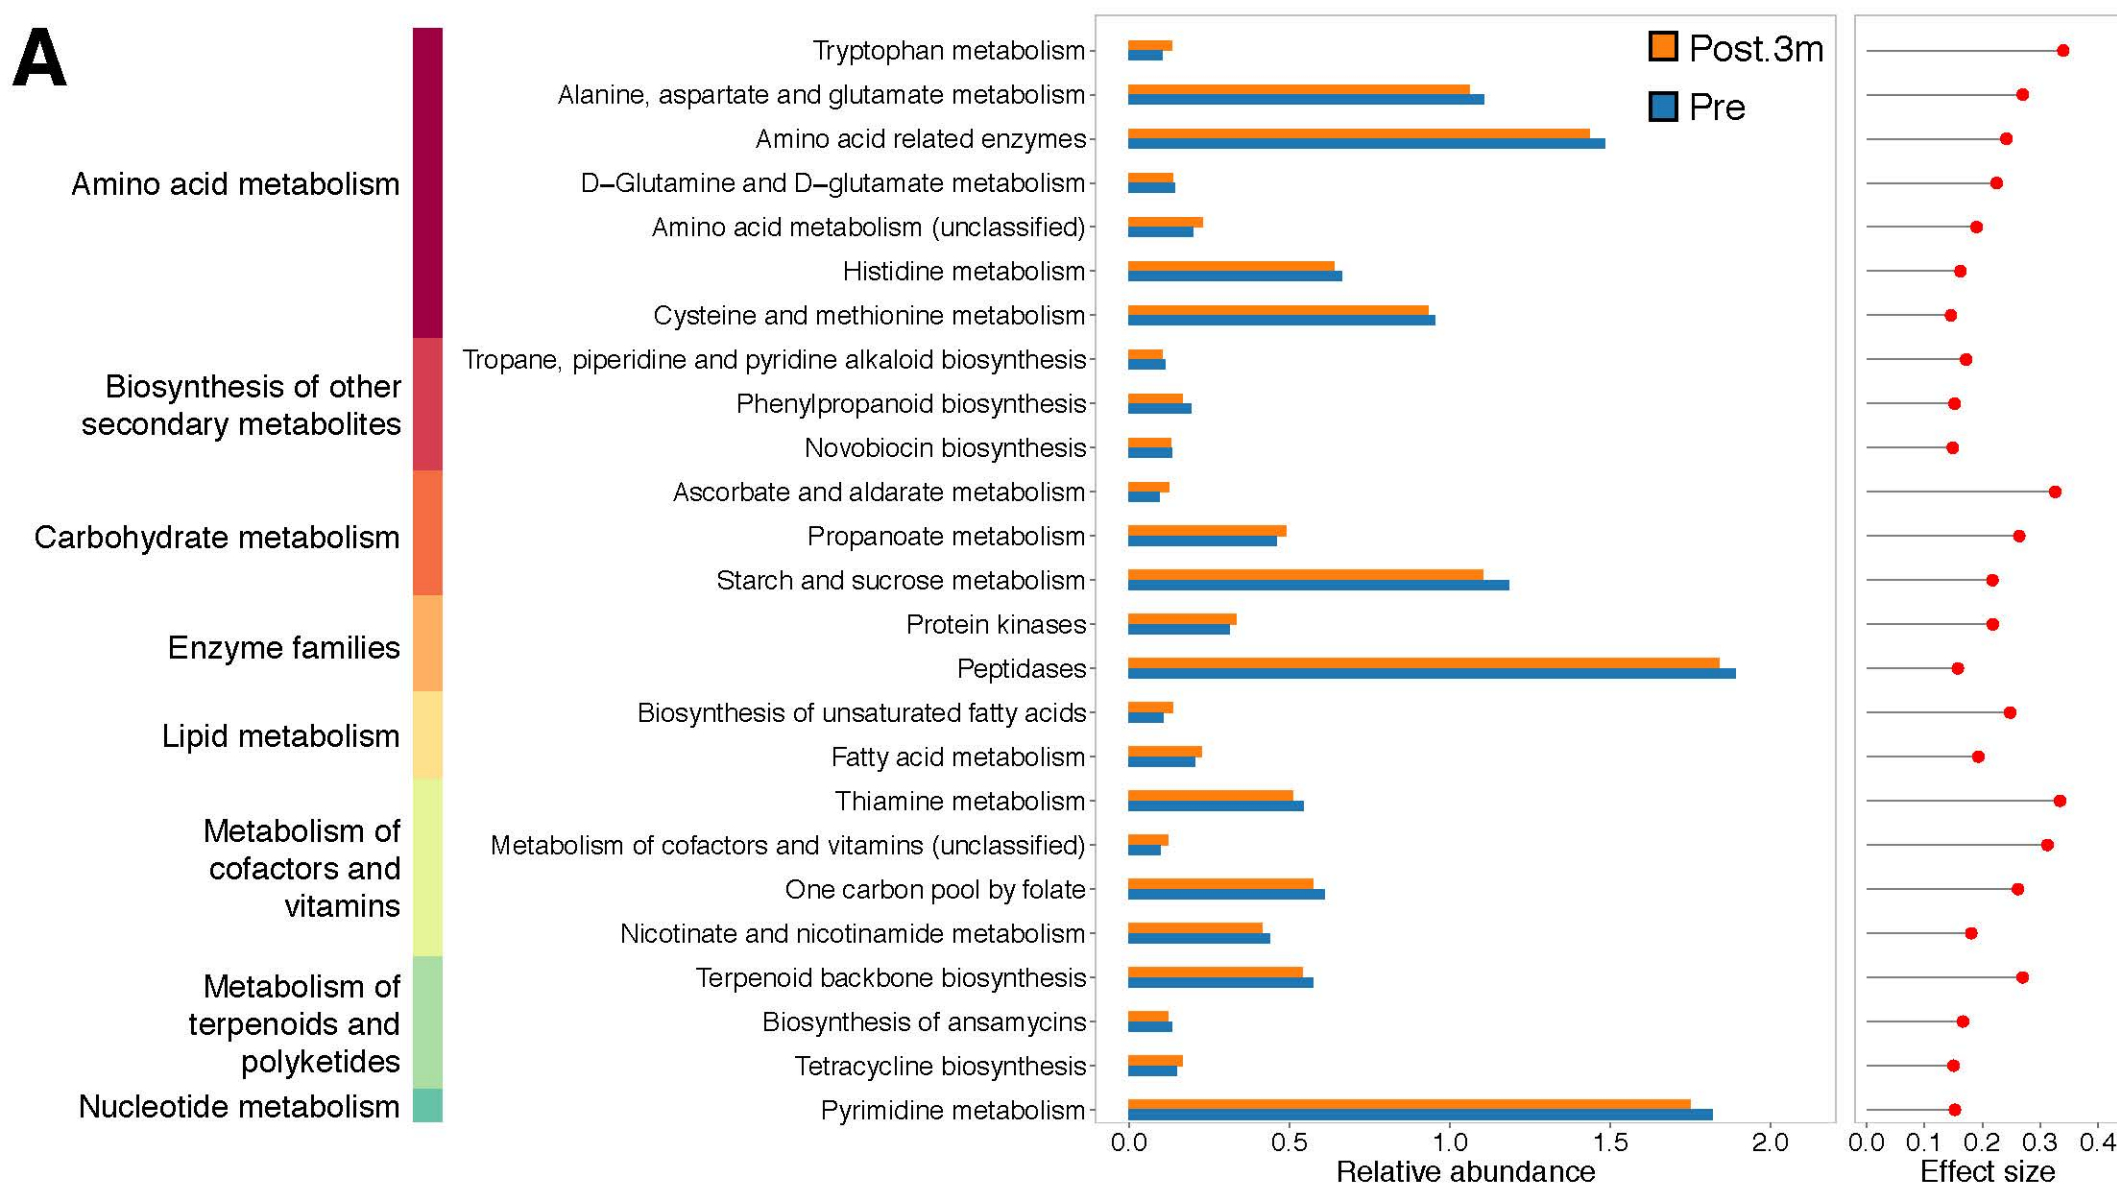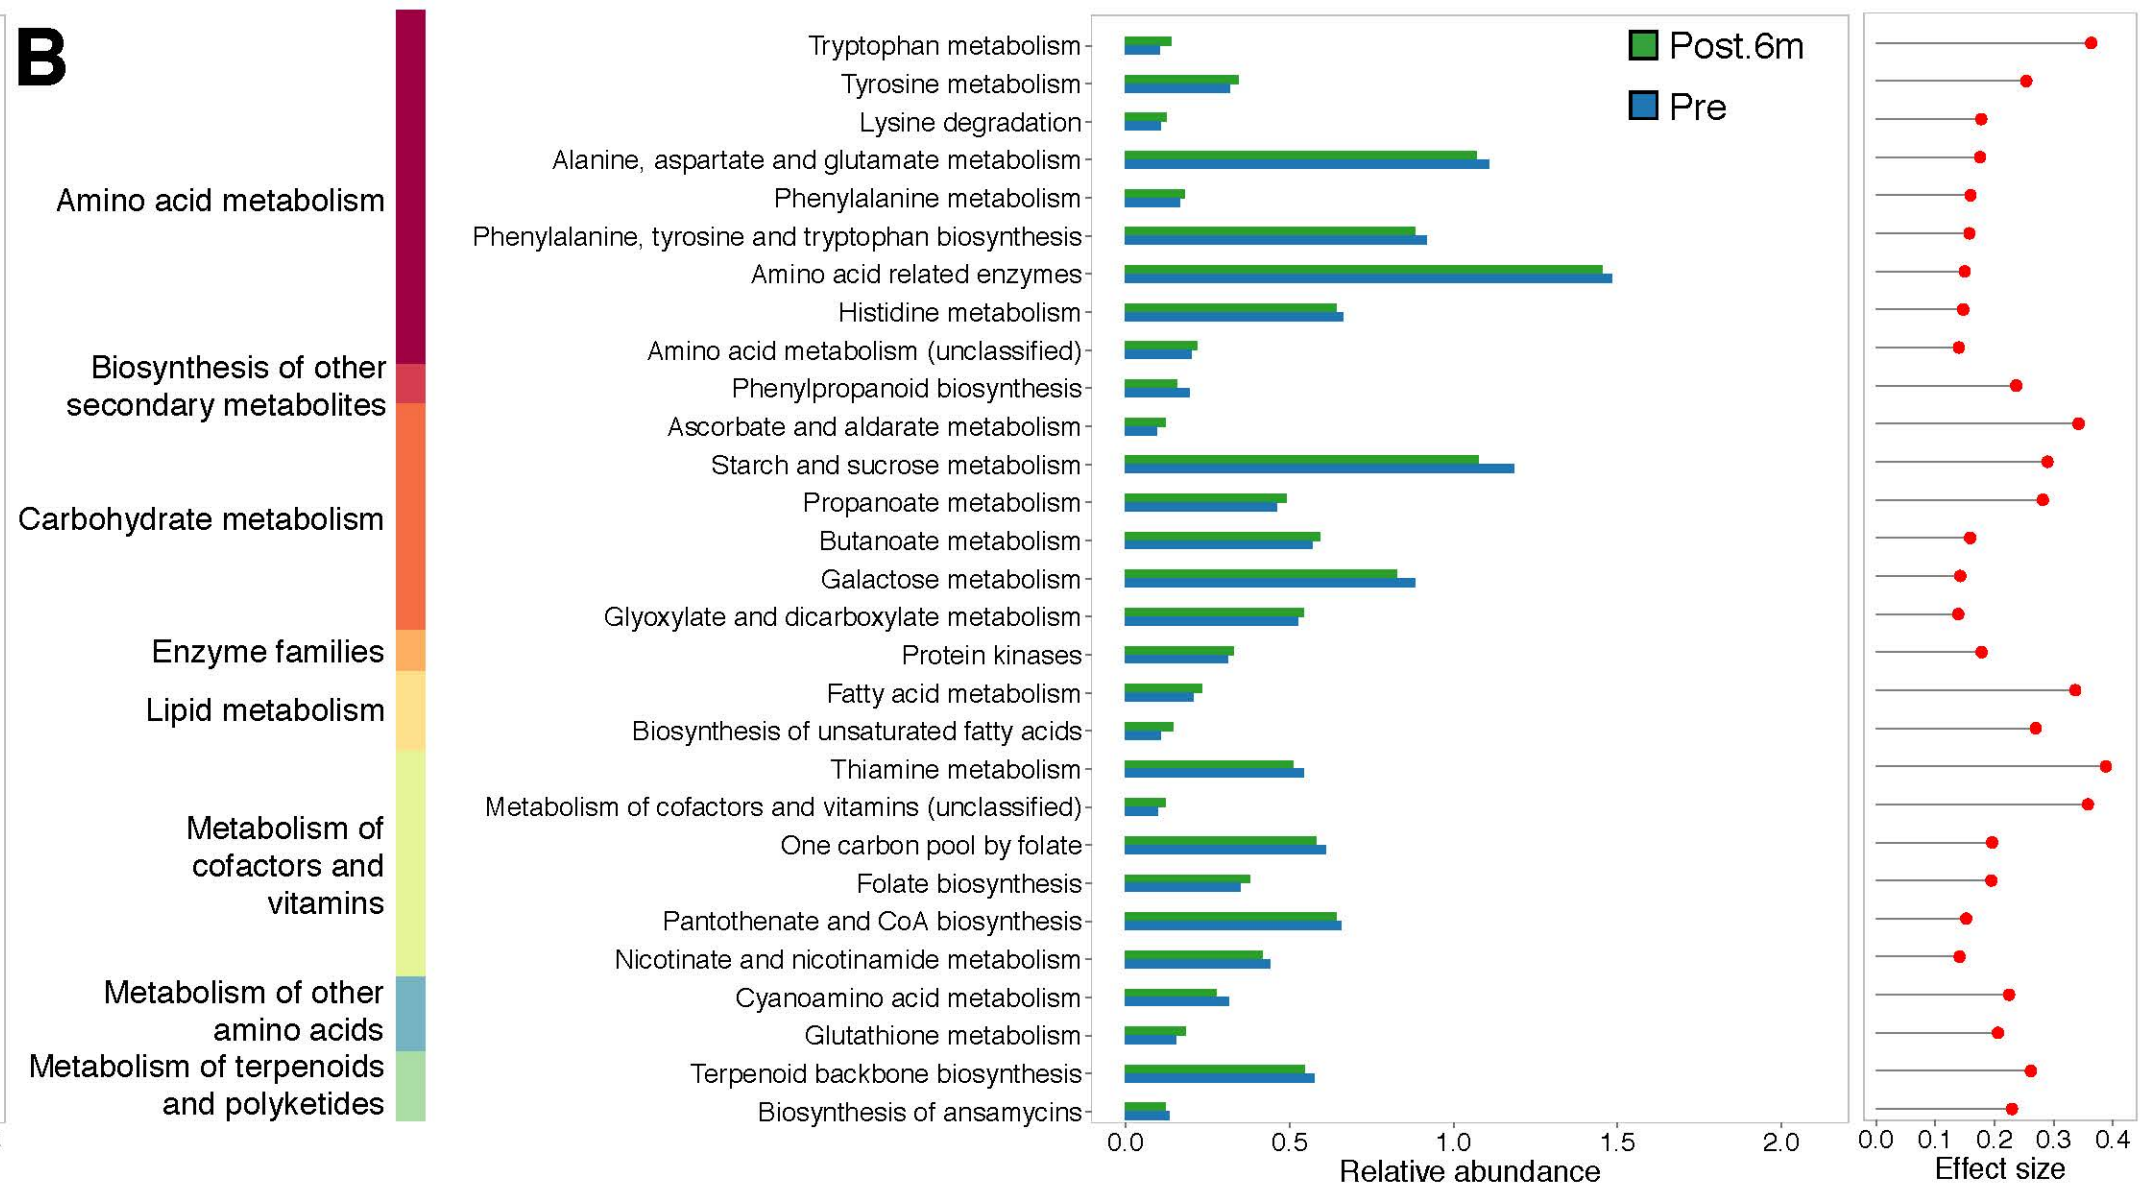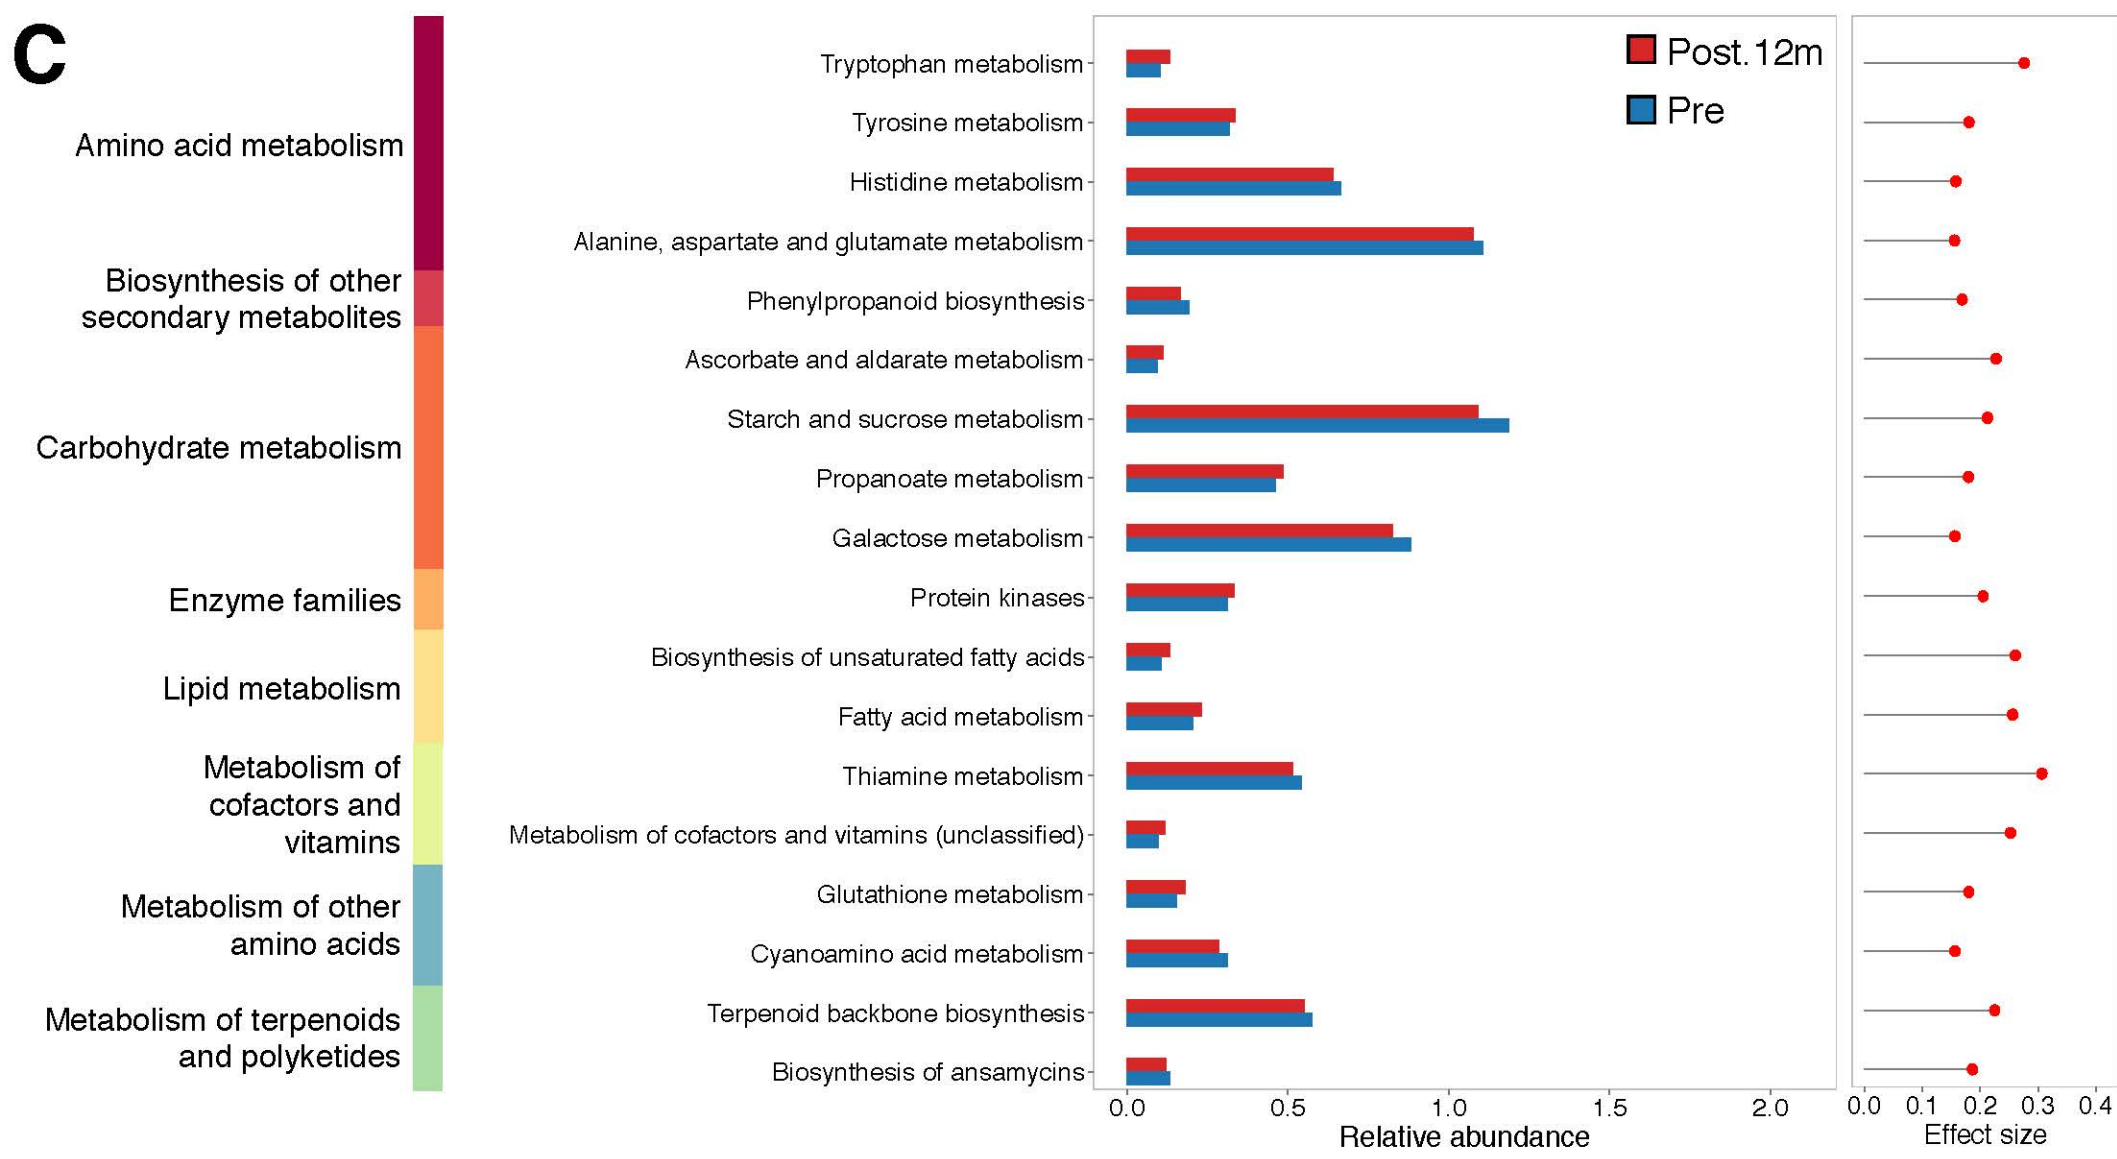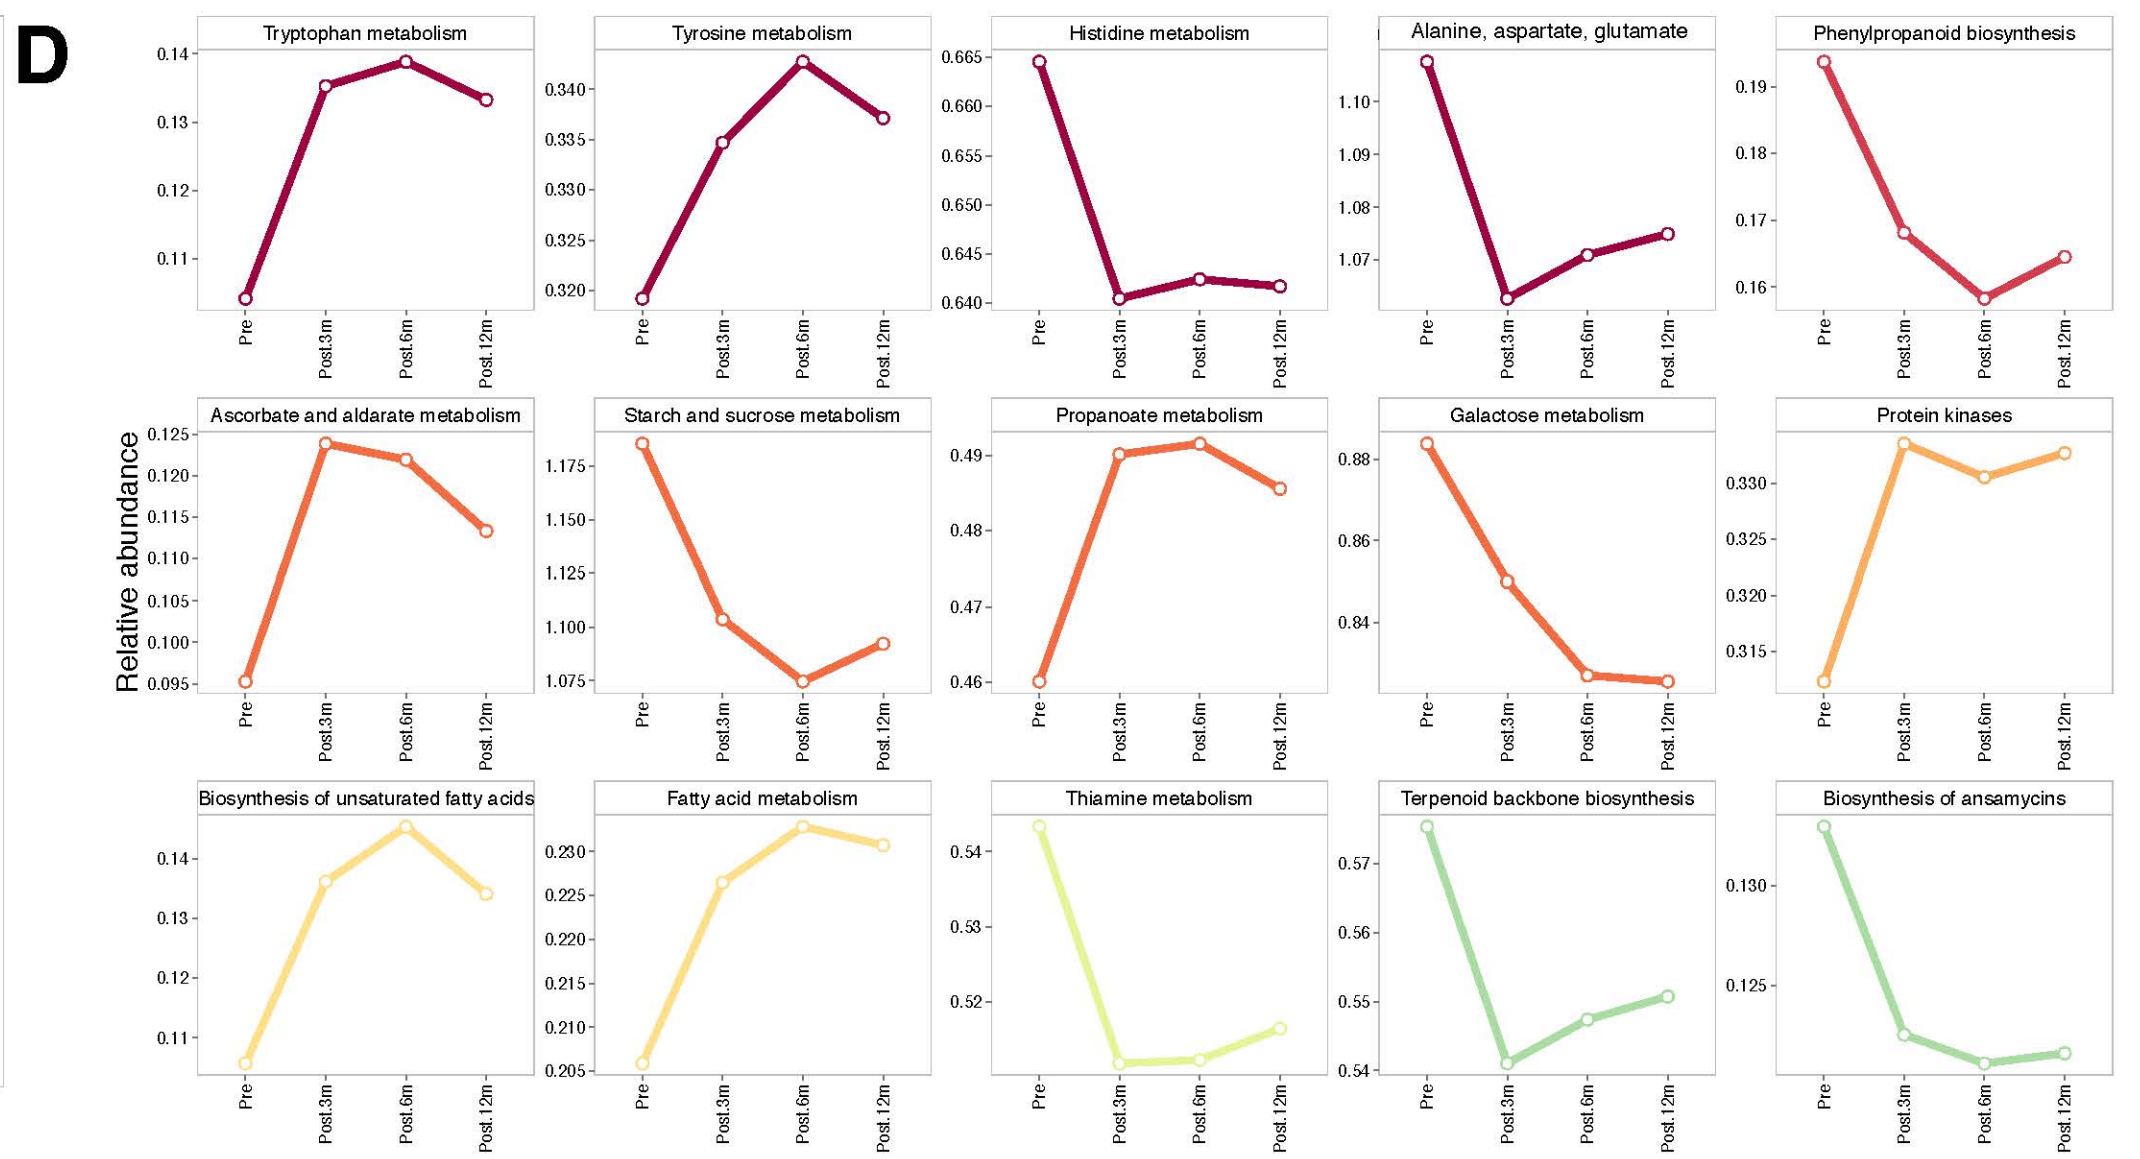

### Supplemental Figure 3: Correlations Analyses

Partial correlations between bacterial taxa and biomarkers significant after false discovery rate (FDR) correction.

Bacteroides with heptanoate (A); Bifidobacterium with total cholesterol (B), LDL cholesterol (C) and weight loss (D); Bacteria with butyrate (E) and choline (F); Butyrivibrio with isobutyrate (G), and HDL (H).

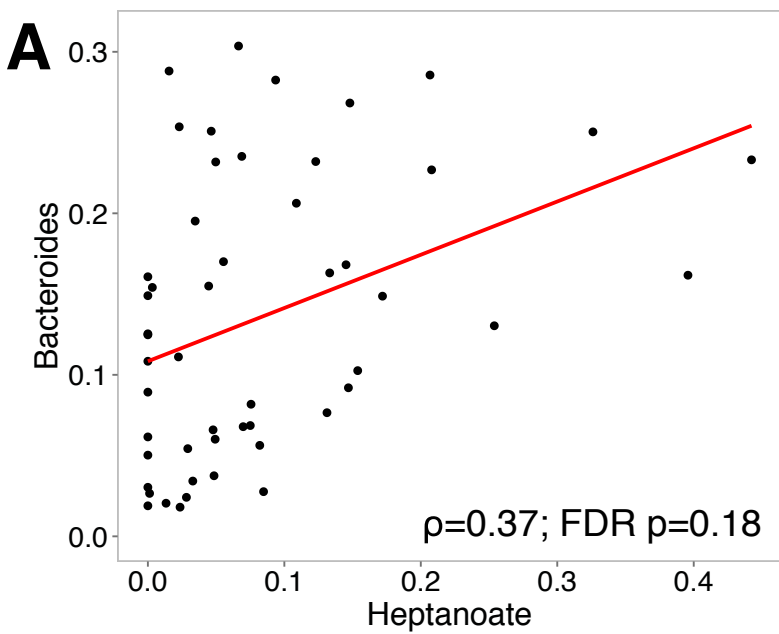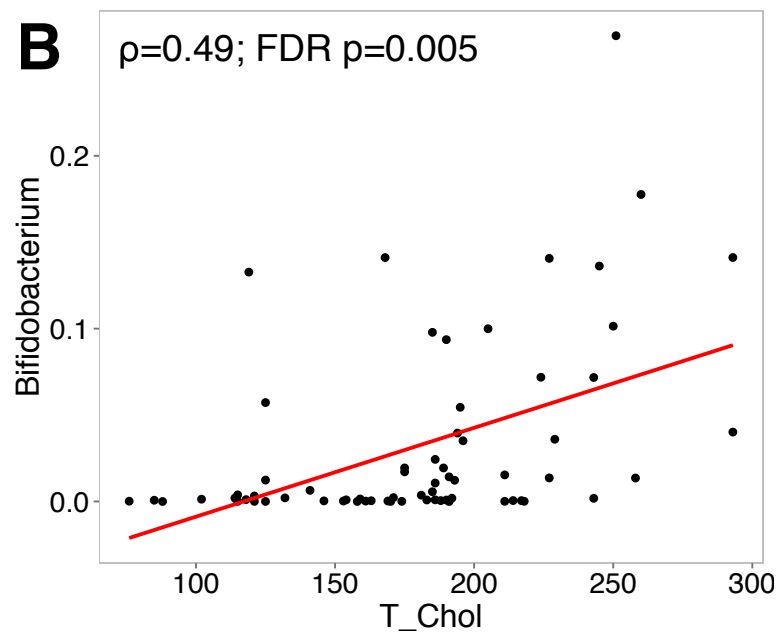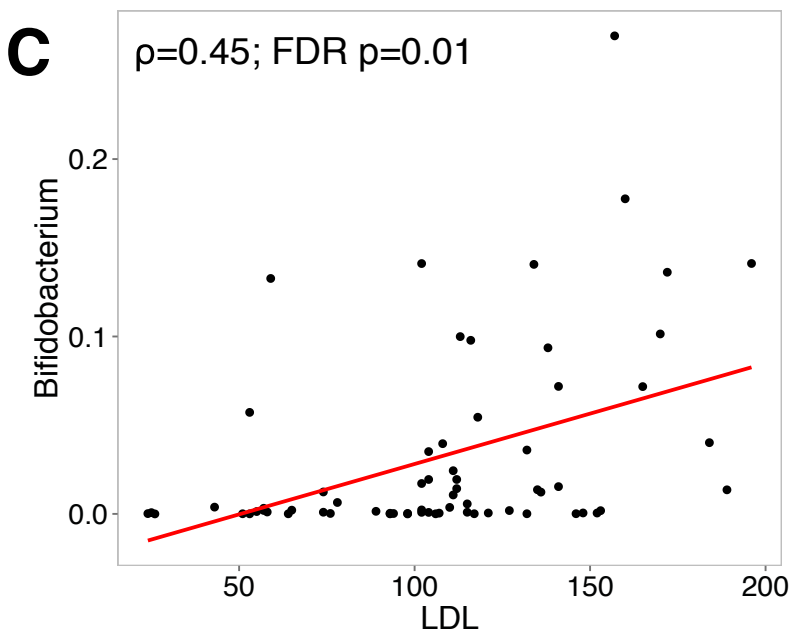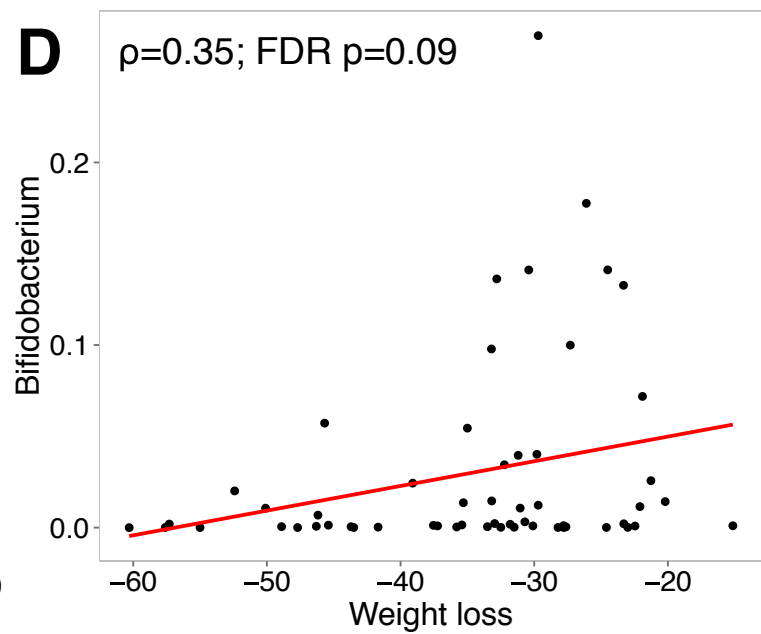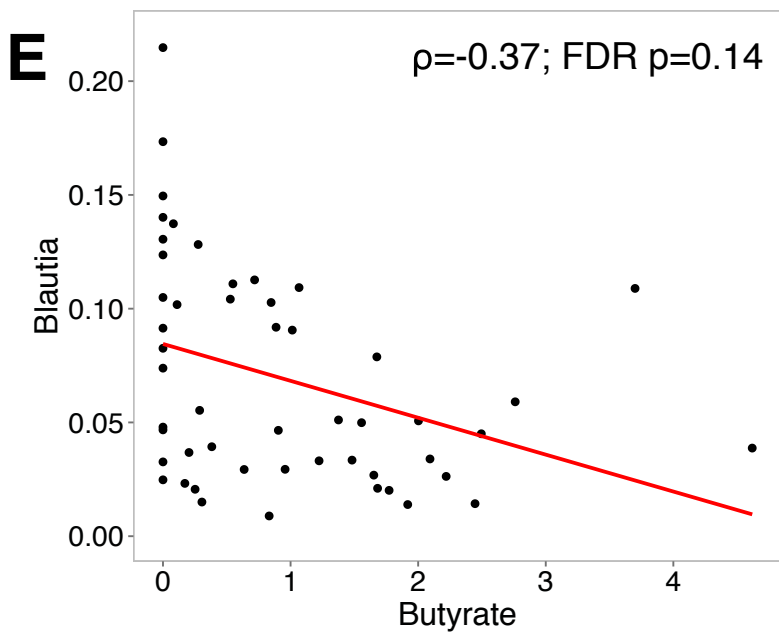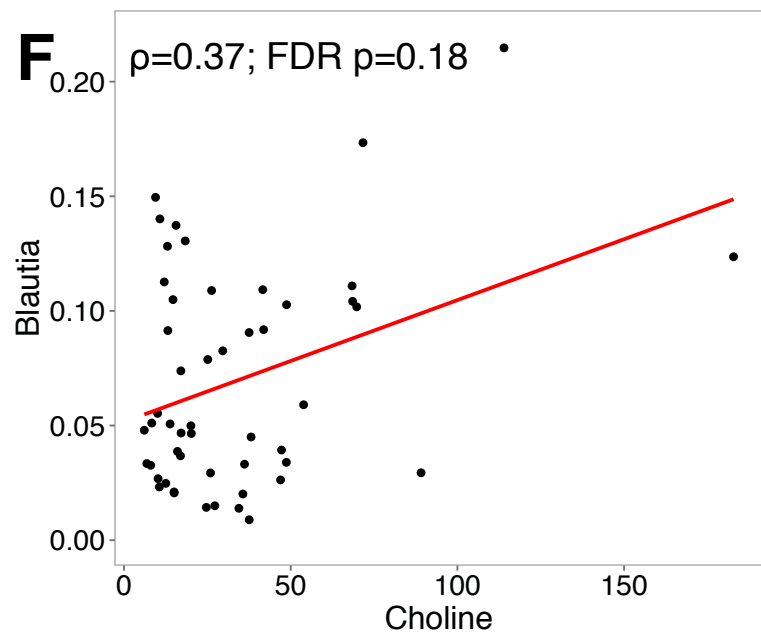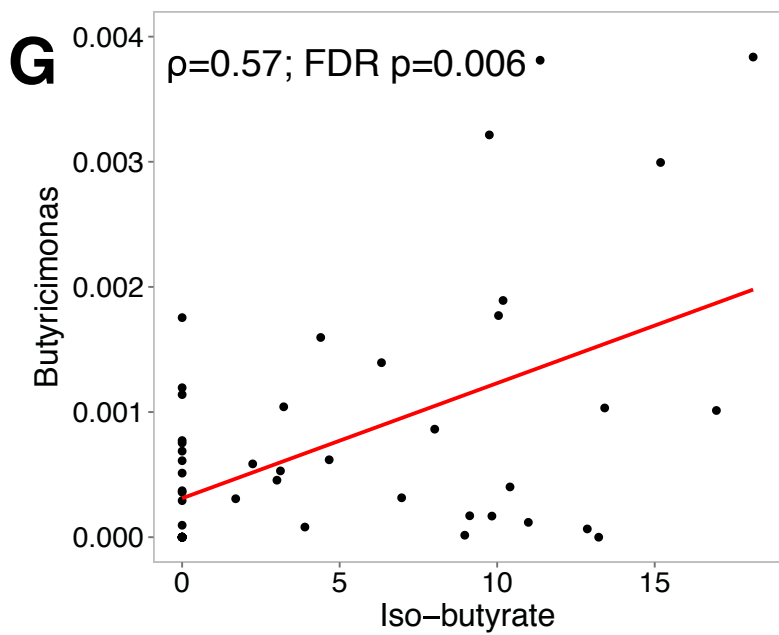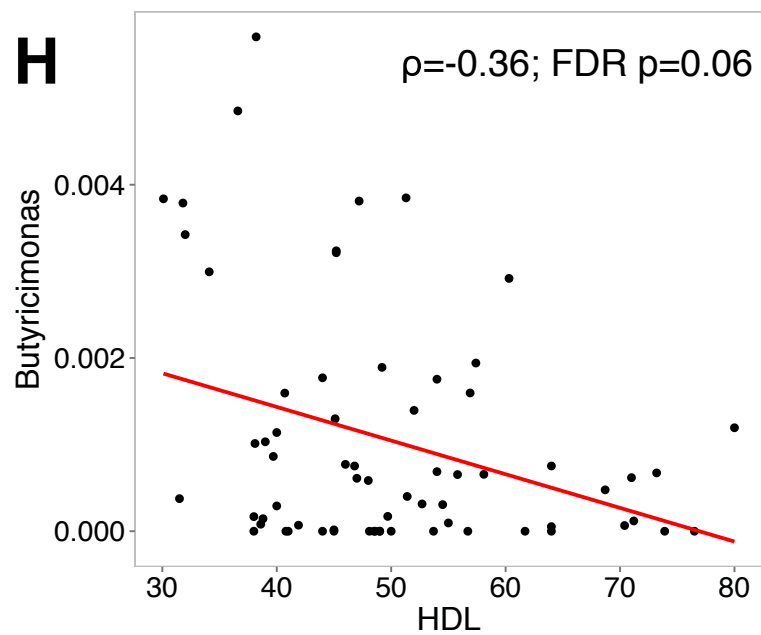



#### Supplemental Figure 4: Network Analyses

Network analysis of co-occurring bacteria at pre-surgery (A), 3m (B), 6m (C), 12m (D) post-surgery.

Circles represent bacterial taxa at the genus level, with color indicating relative abundance from red (high) to yellow (low). Edges between nodes indicate significant correlations (blue: positive; dashed gray: negative), with length of the edge representing strength of the correlation (shorter edges indicating higher correlation). Triangles represent biomarkers that are significantly correlated with bacterial clusters, magnified in the sub-panels.

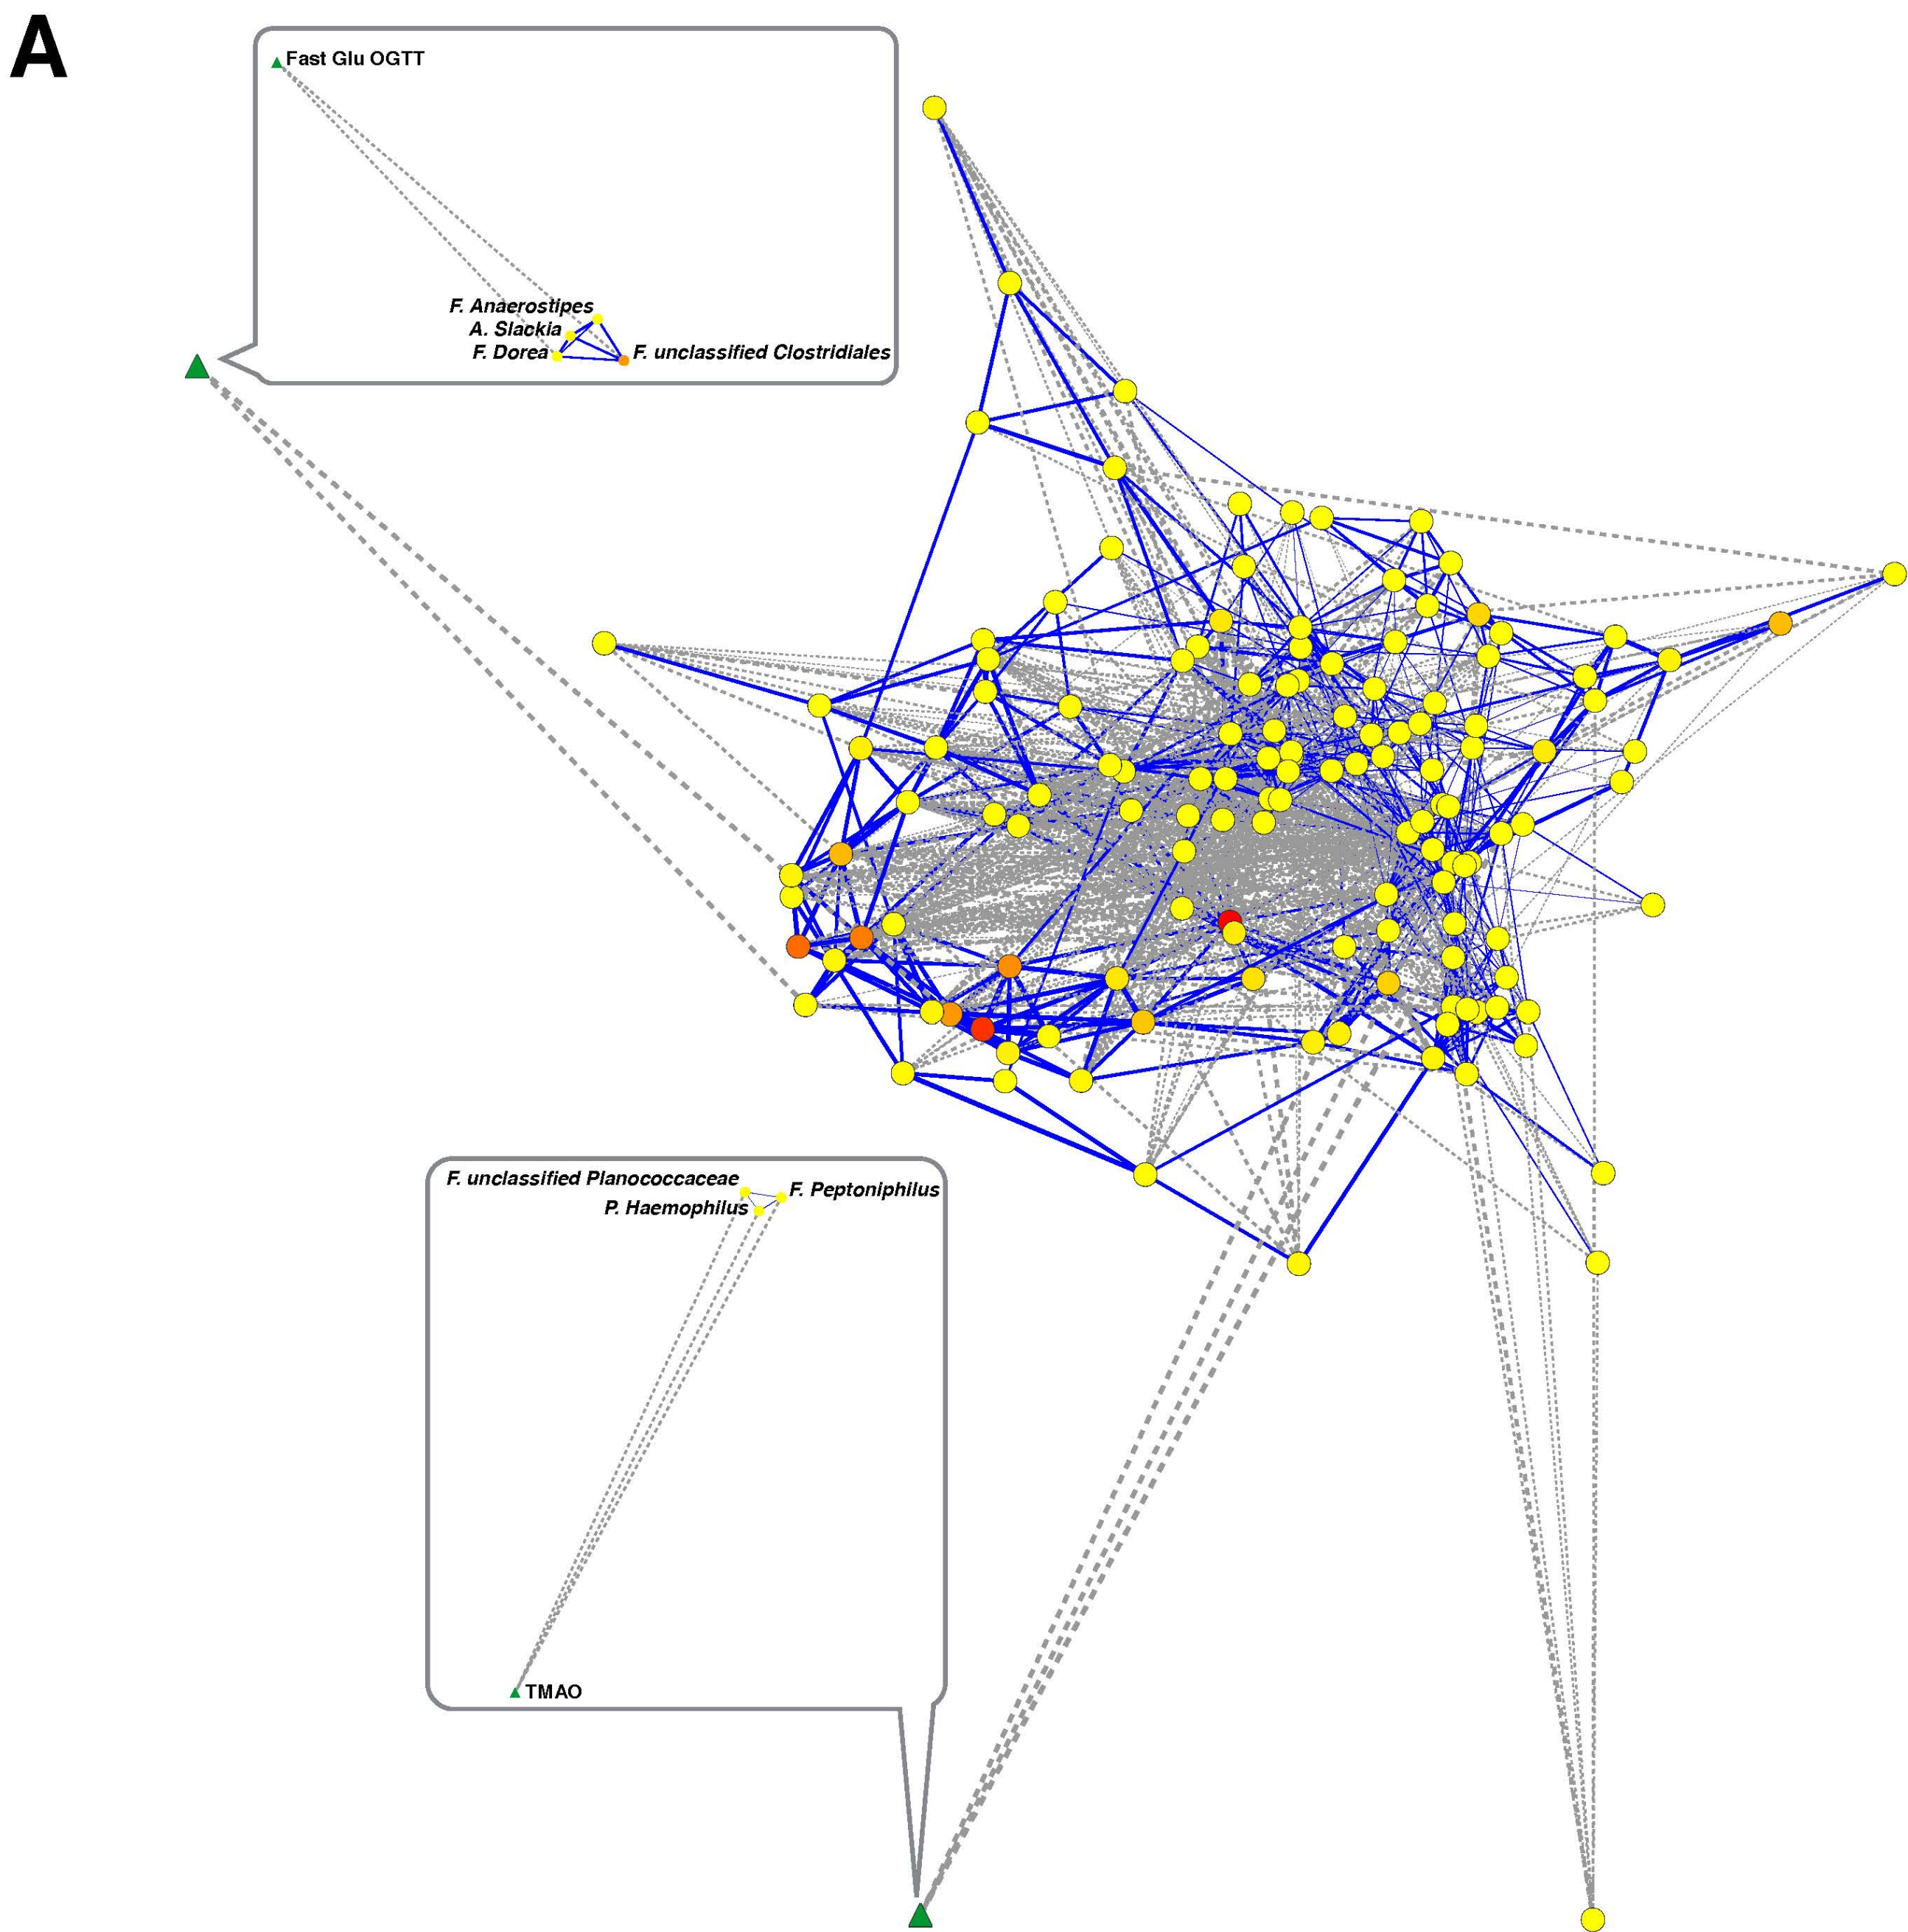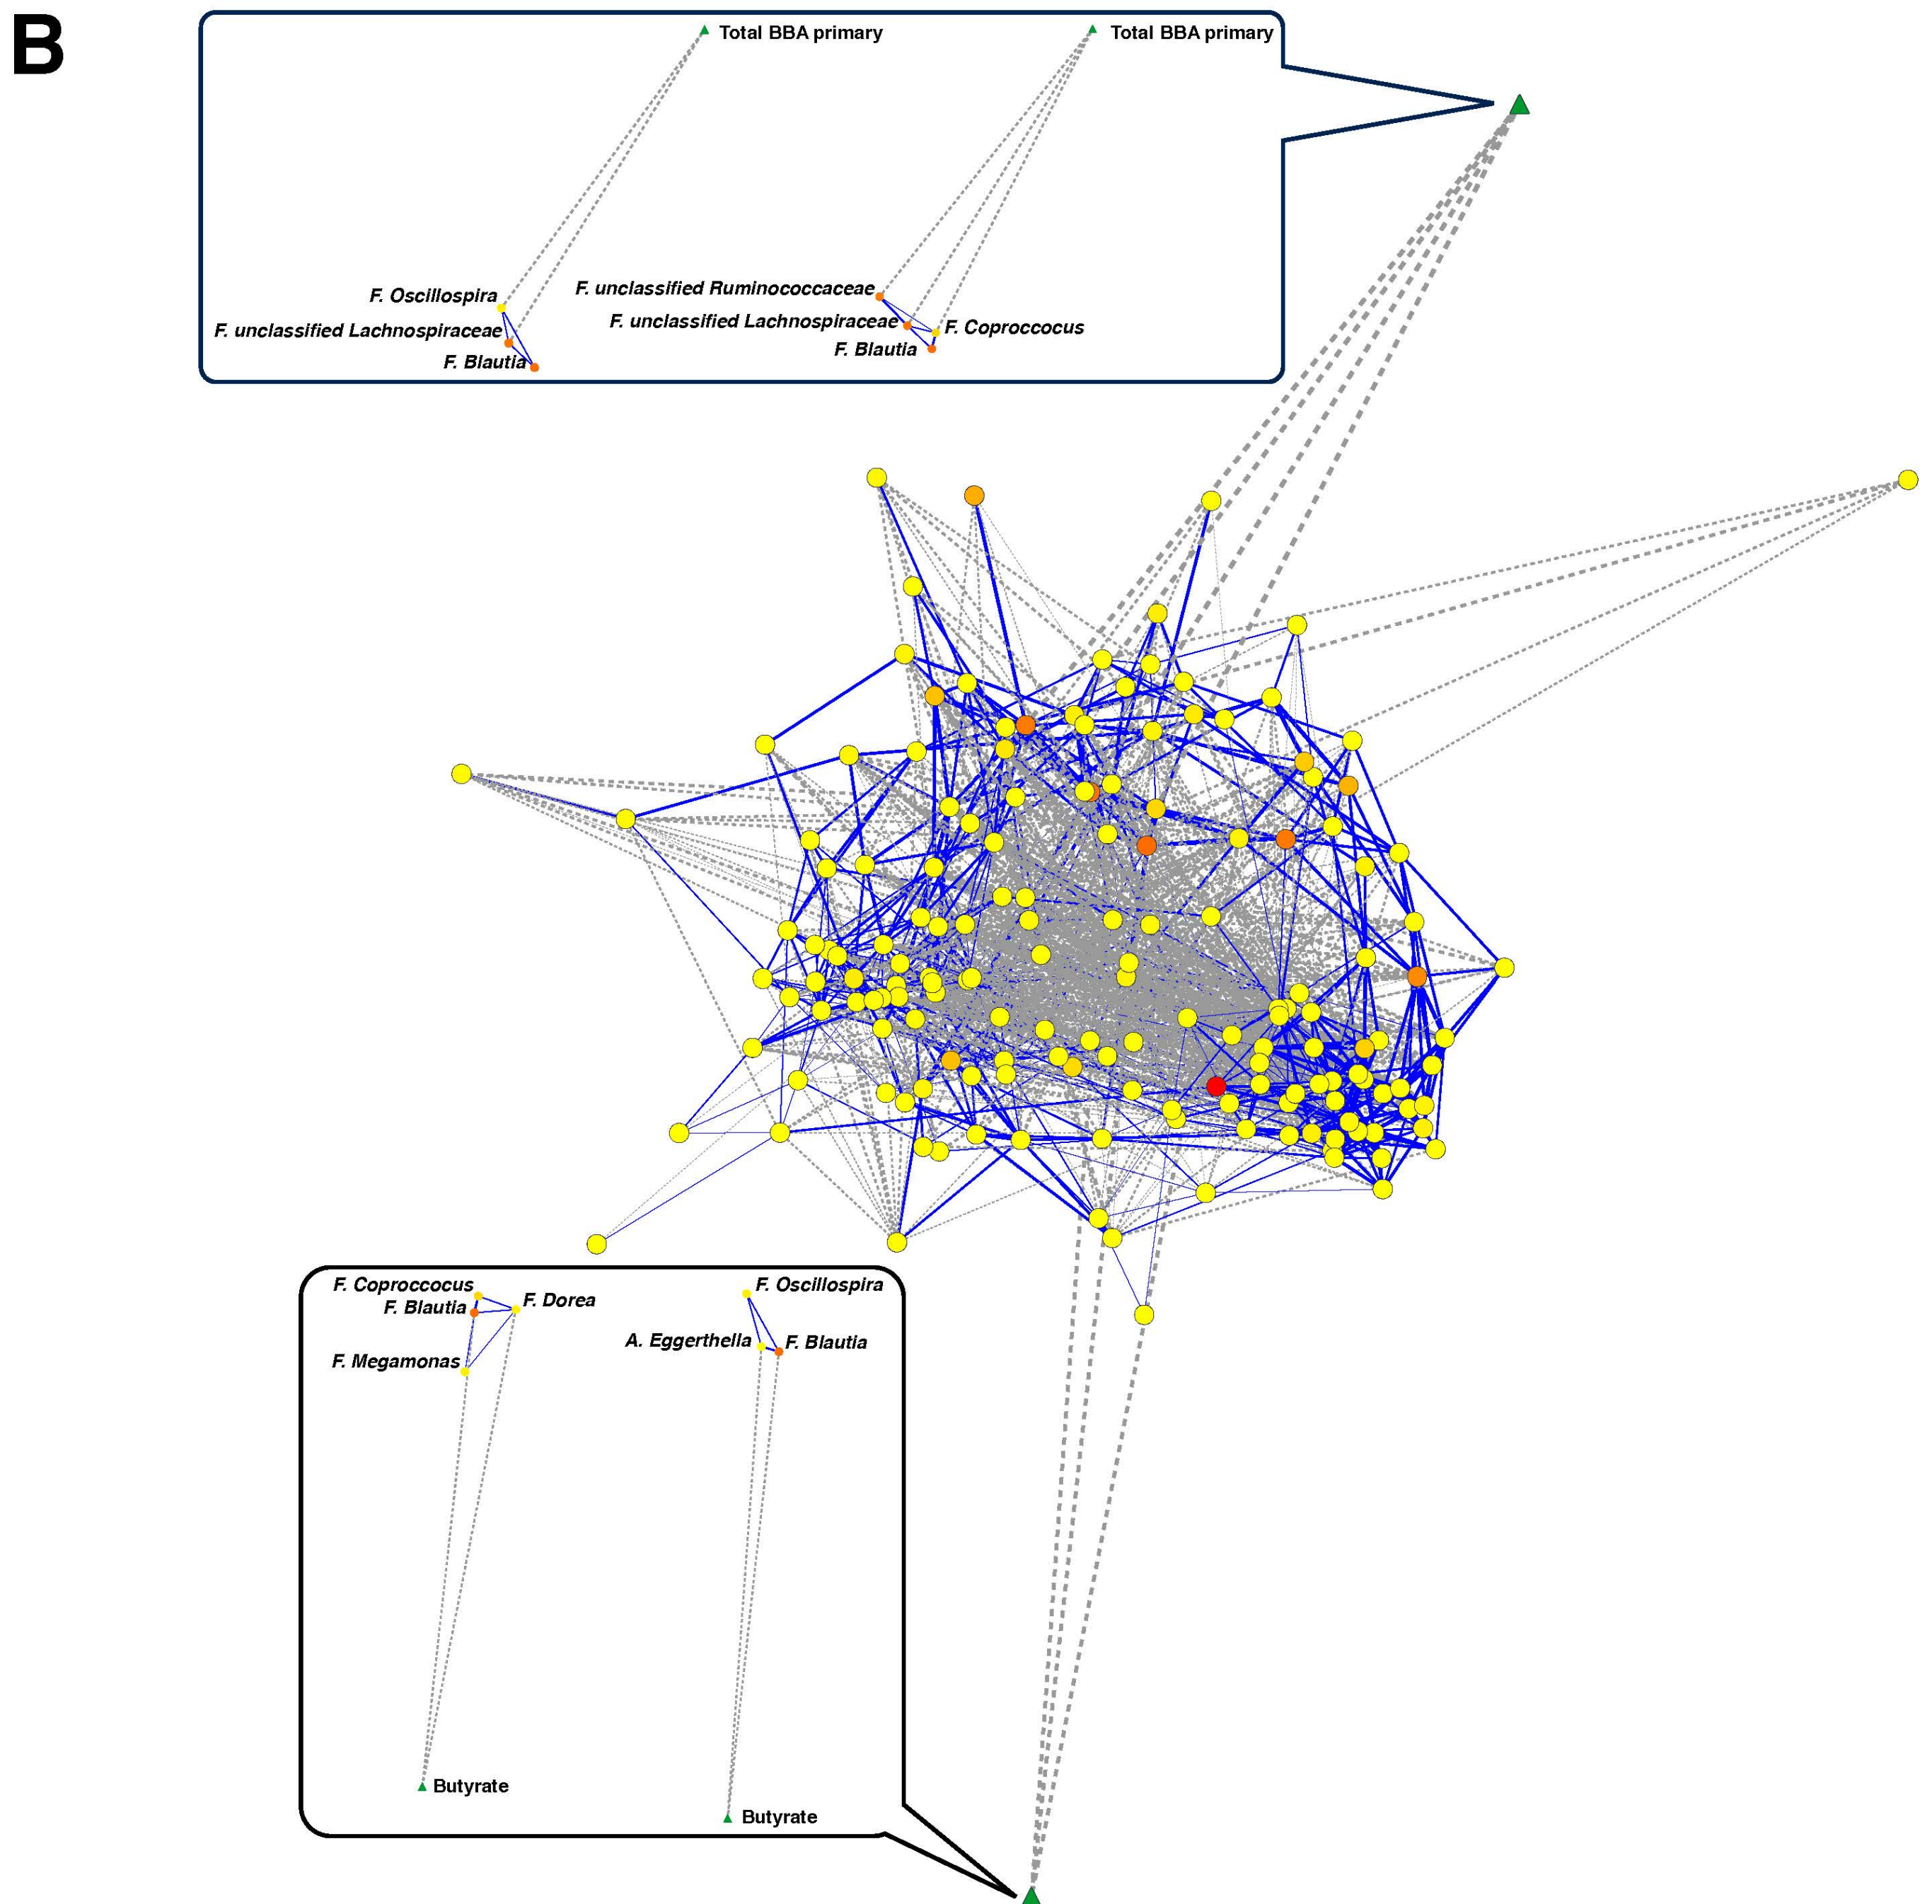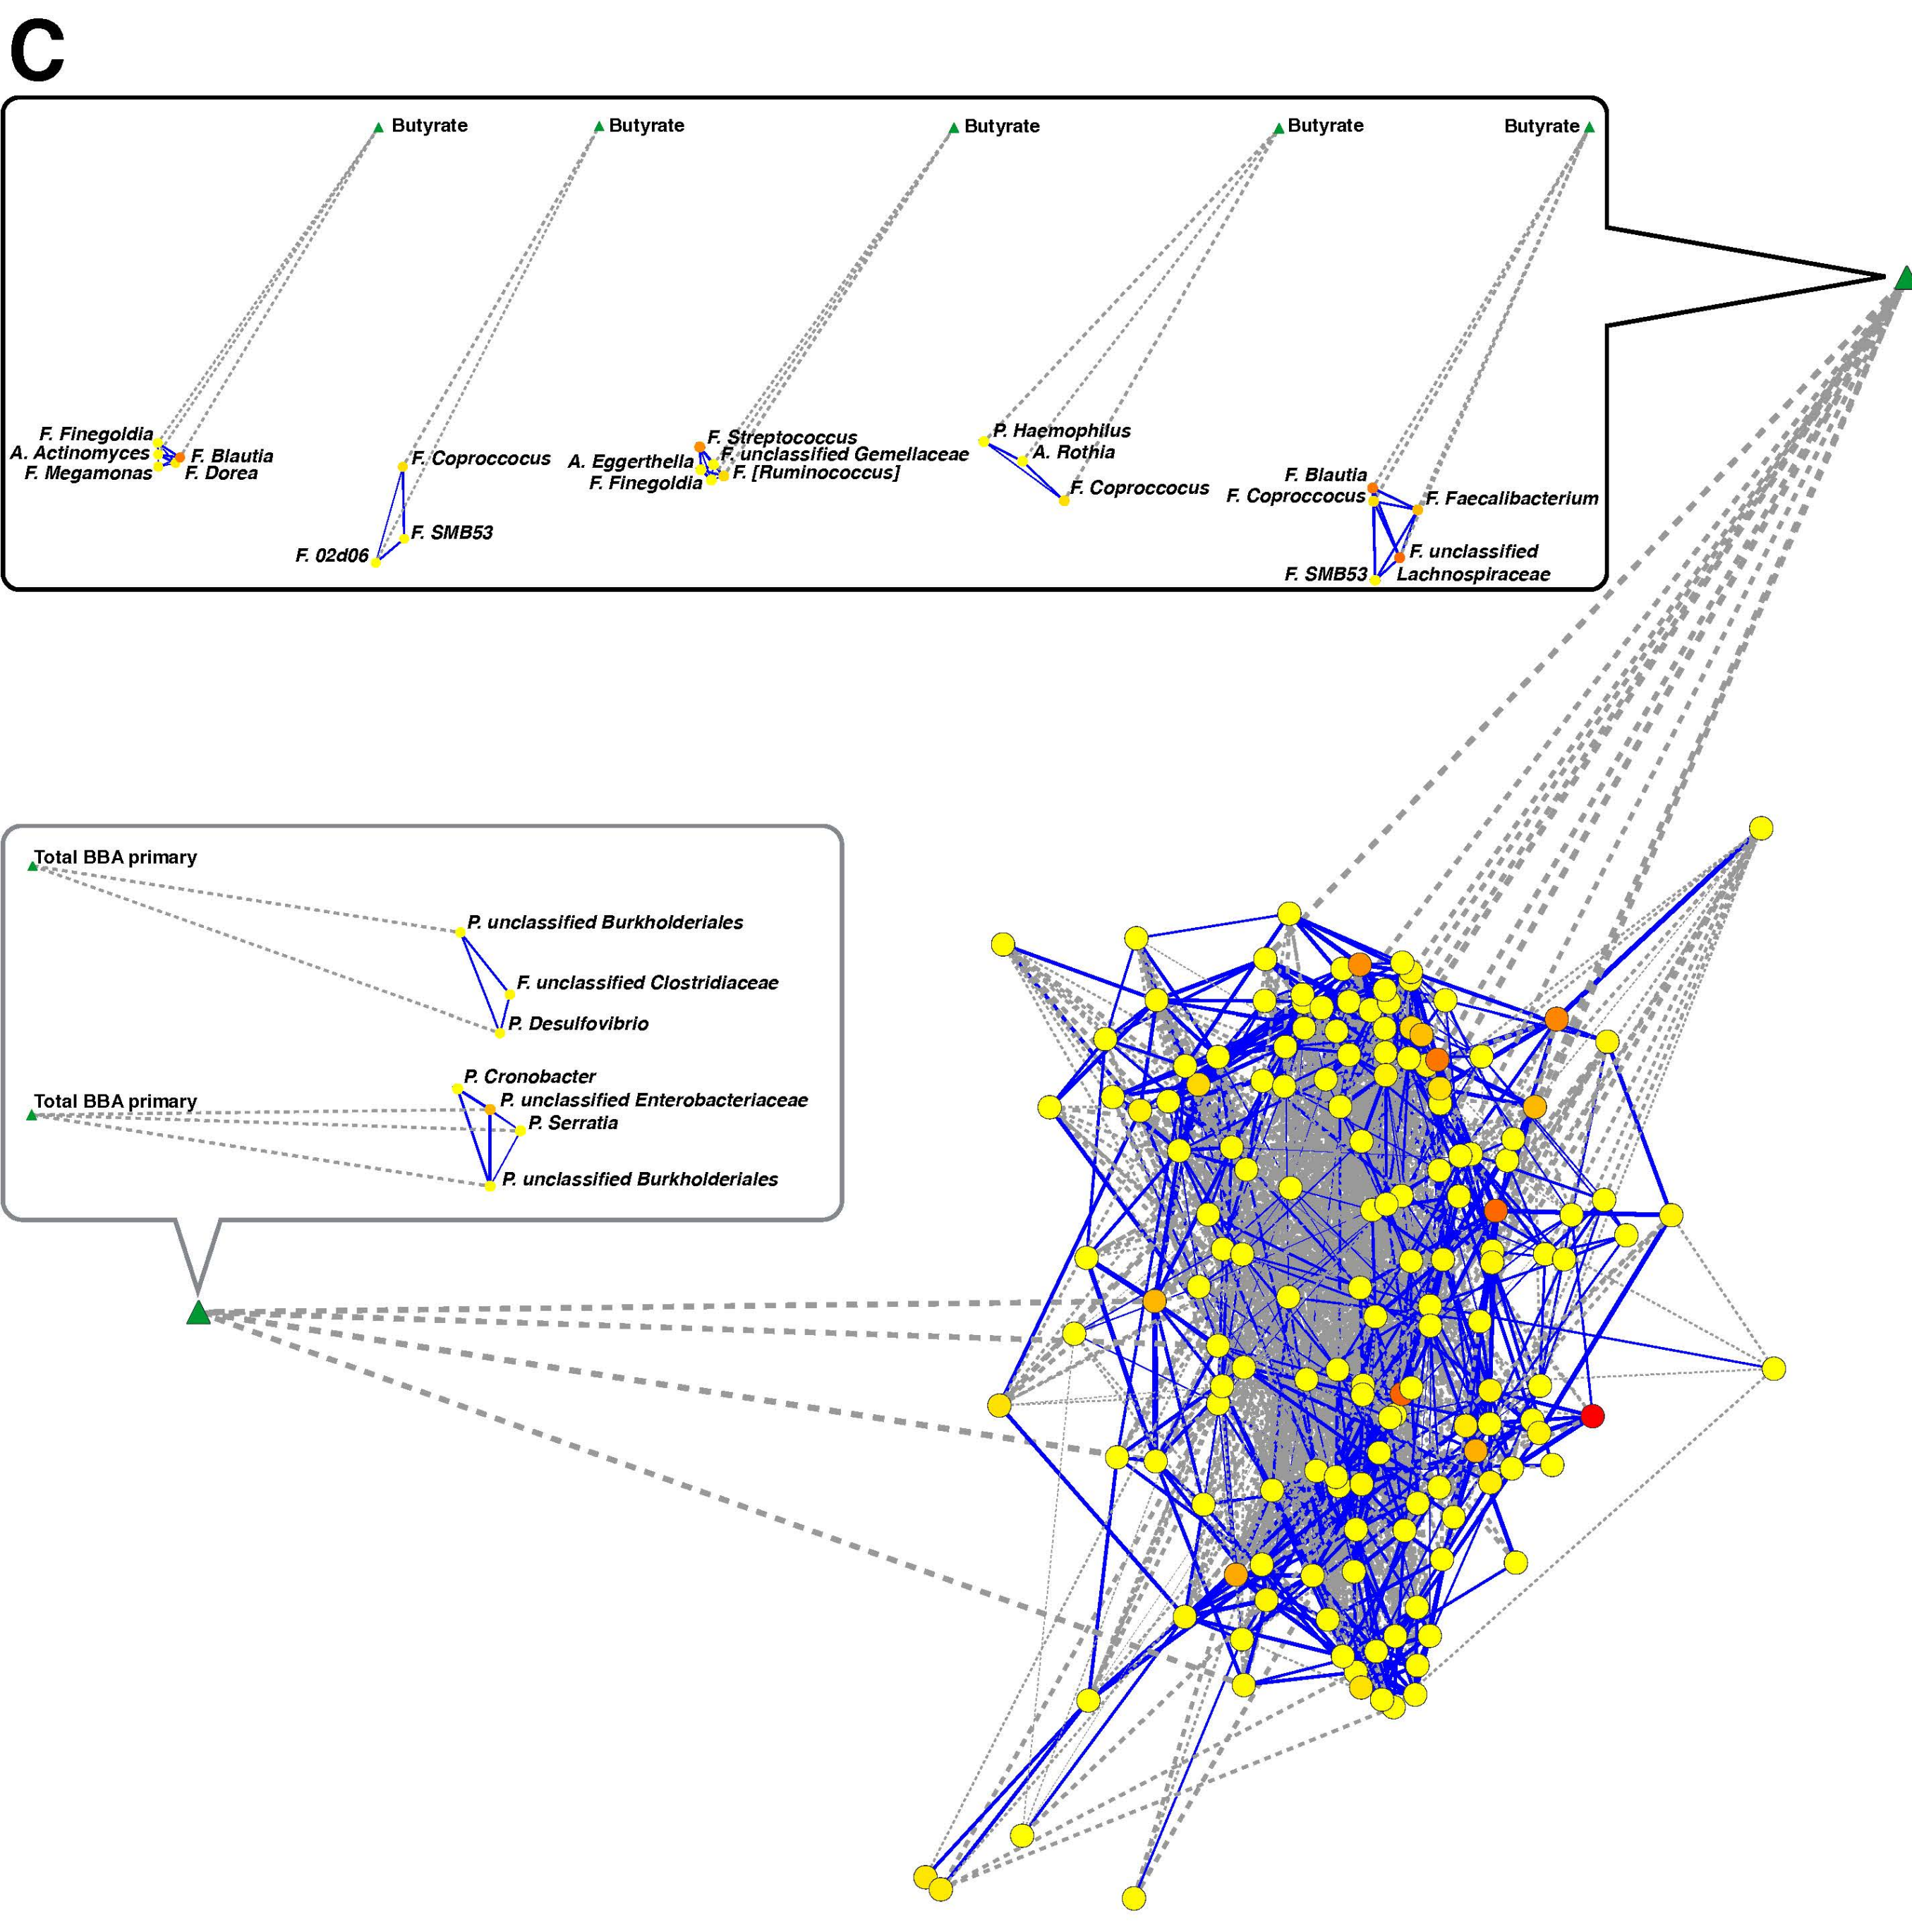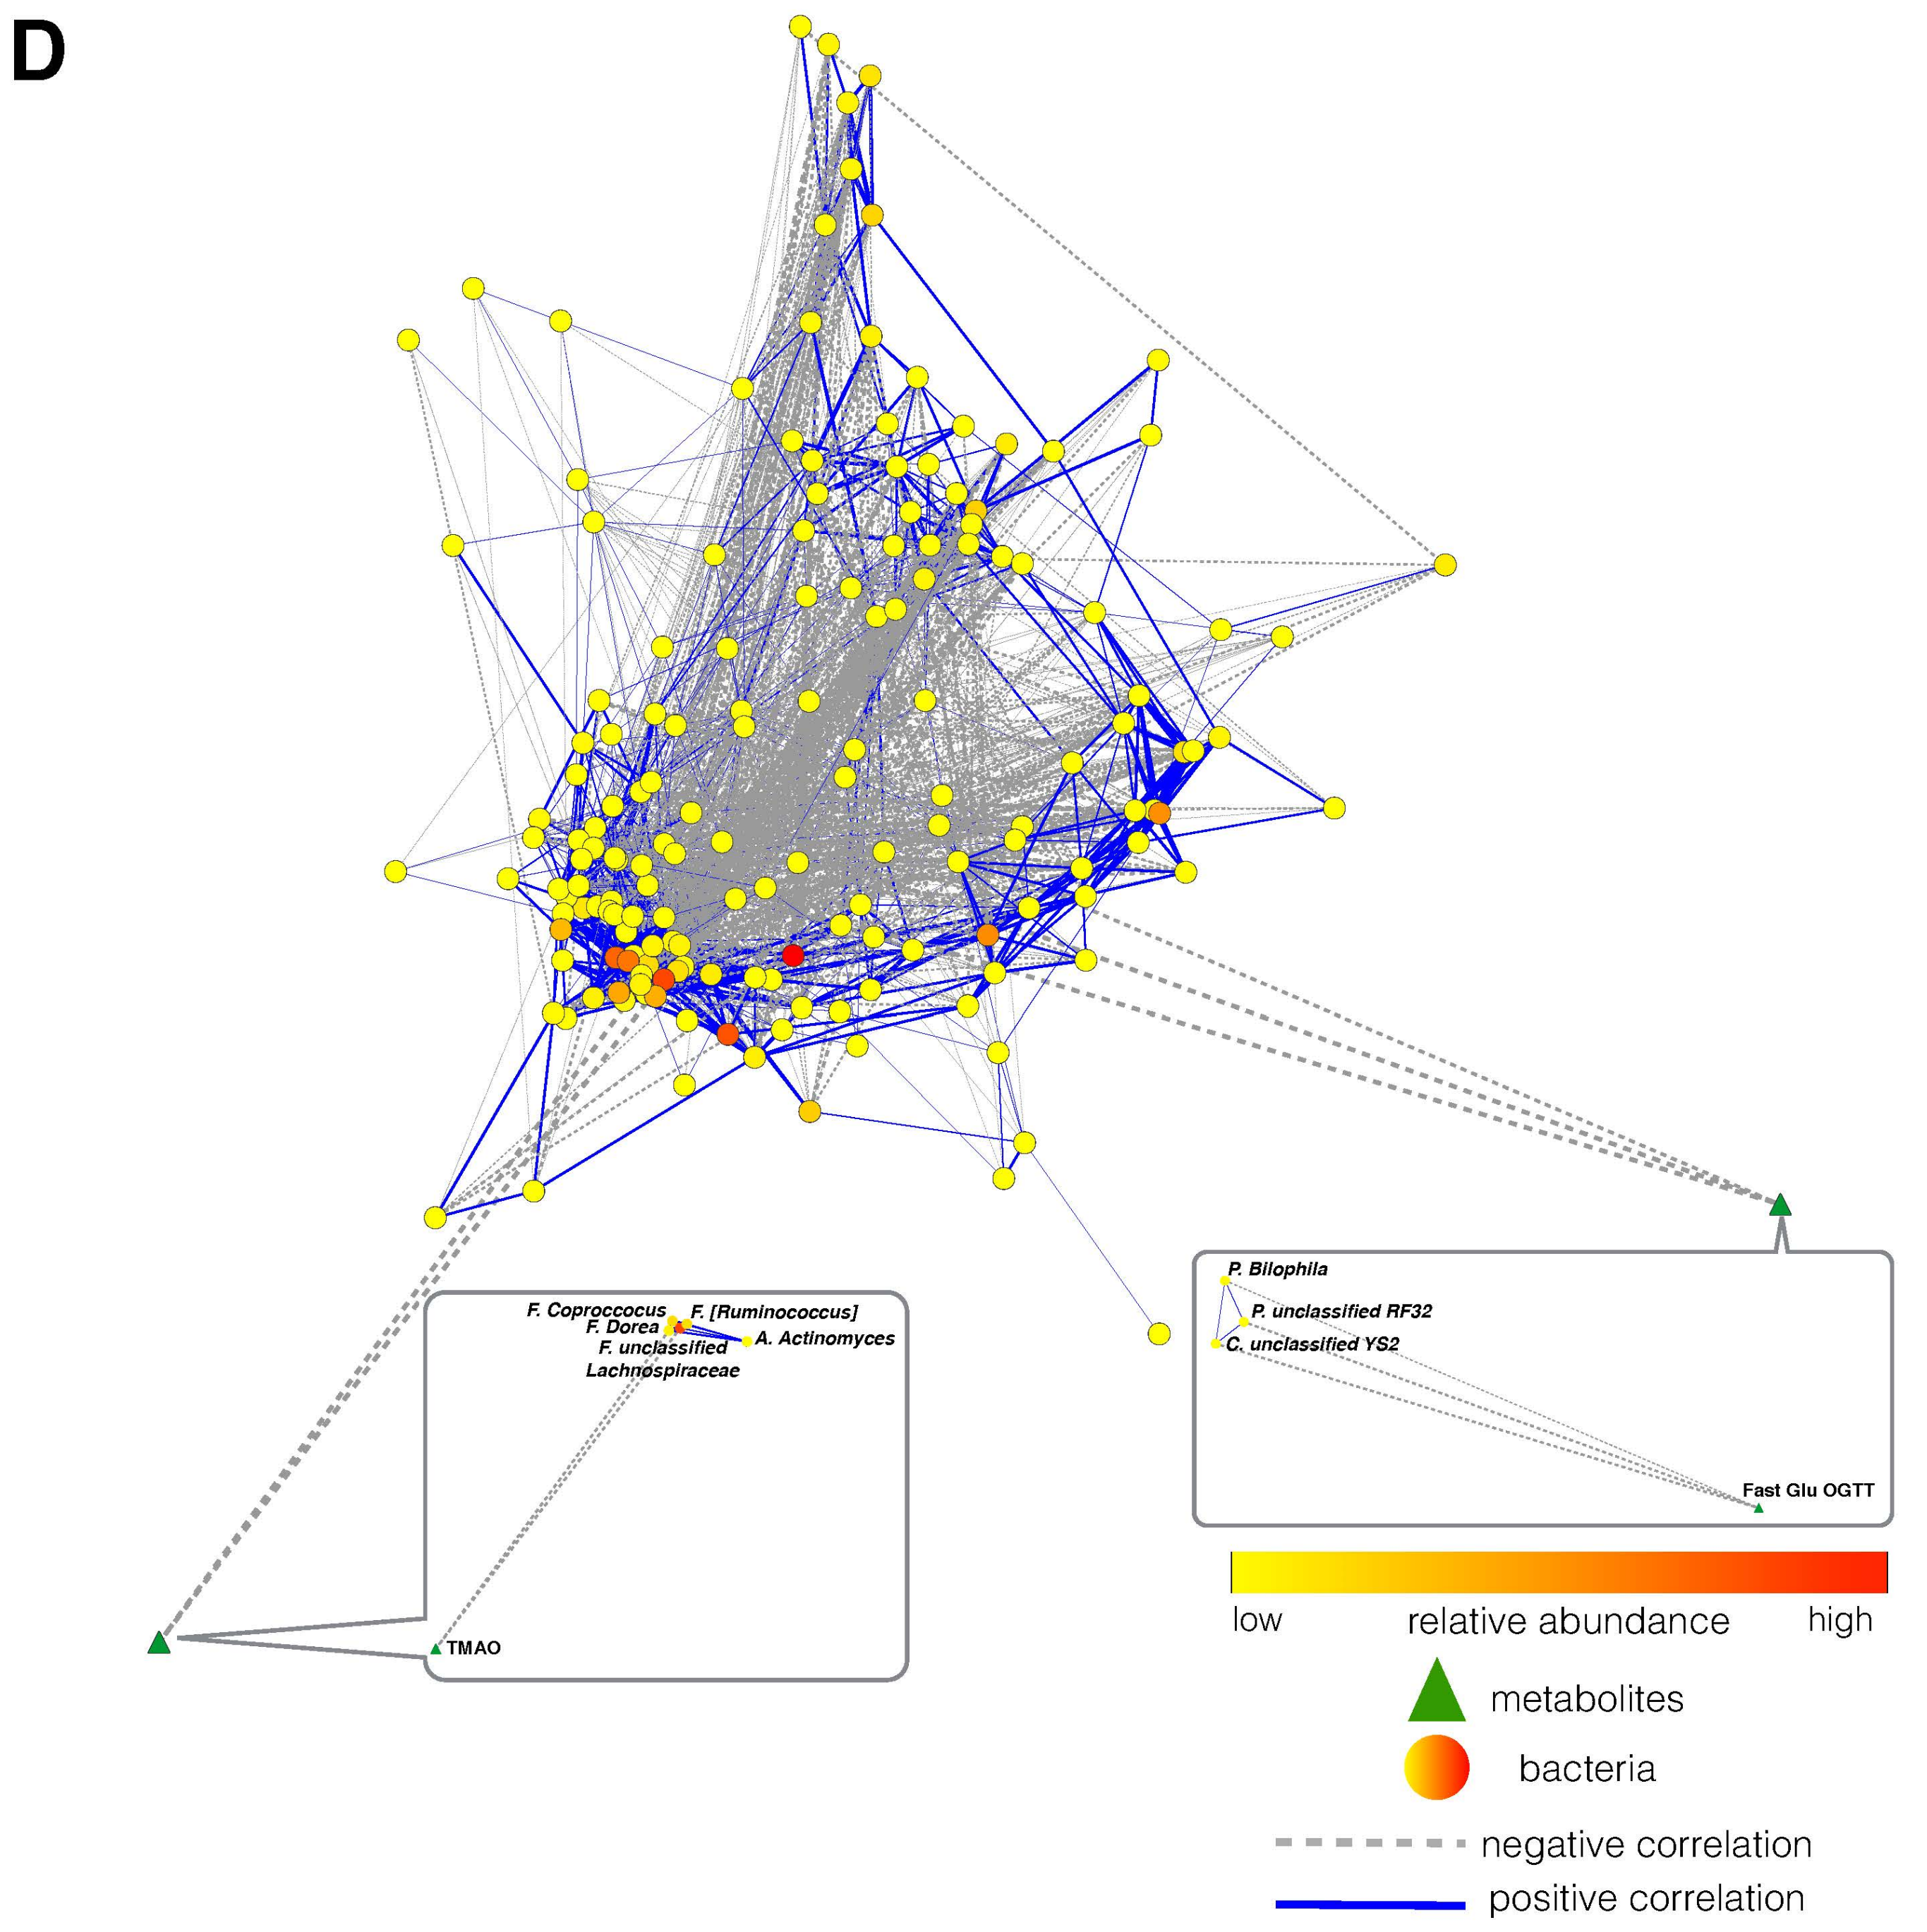

Supplement: NIHMS1531476-supplement-1.pdf [file NIHMS1531476-supplement-1.pdf]
